# Supplementary material for: A sustainable bias-free photoelectrochemical system for CO2 reduction into formate coupled with aldehyde synthesis
Source: Research Square preprint supplement (doi:10.21203/rs.3.rs-6940658/v1), 2025-07-09
Supplement: Supplementary file 1 [file 802cbe8cf5ec755c18fa59dd.docx]

**A sustainable bias-free photoelectrochemical system for CO2 reduction into formate coupled with aldehyde synthesis**

Madasamy Thangamuthu*, Emerson C. Kohlrausch, Tara Lemercier, Tom Burwell, Matthew Young, Jesum Alves Fernandes, Andrei N. Khlobystov*

School of Chemistry, University of Nottingham, University Park, Nottingham NG7 2RD, United Kingdom

[Madasamy.thangamuthu1@nottingham.ac.uk](mailto:Madasamy.thangamuthu1@nottingham.ac.uk)

[Andrei.khlobystov@nottingham.ac.uk](mailto:Andrei.khlobystov@nottingham.ac.uk)

**Supporting information**

**
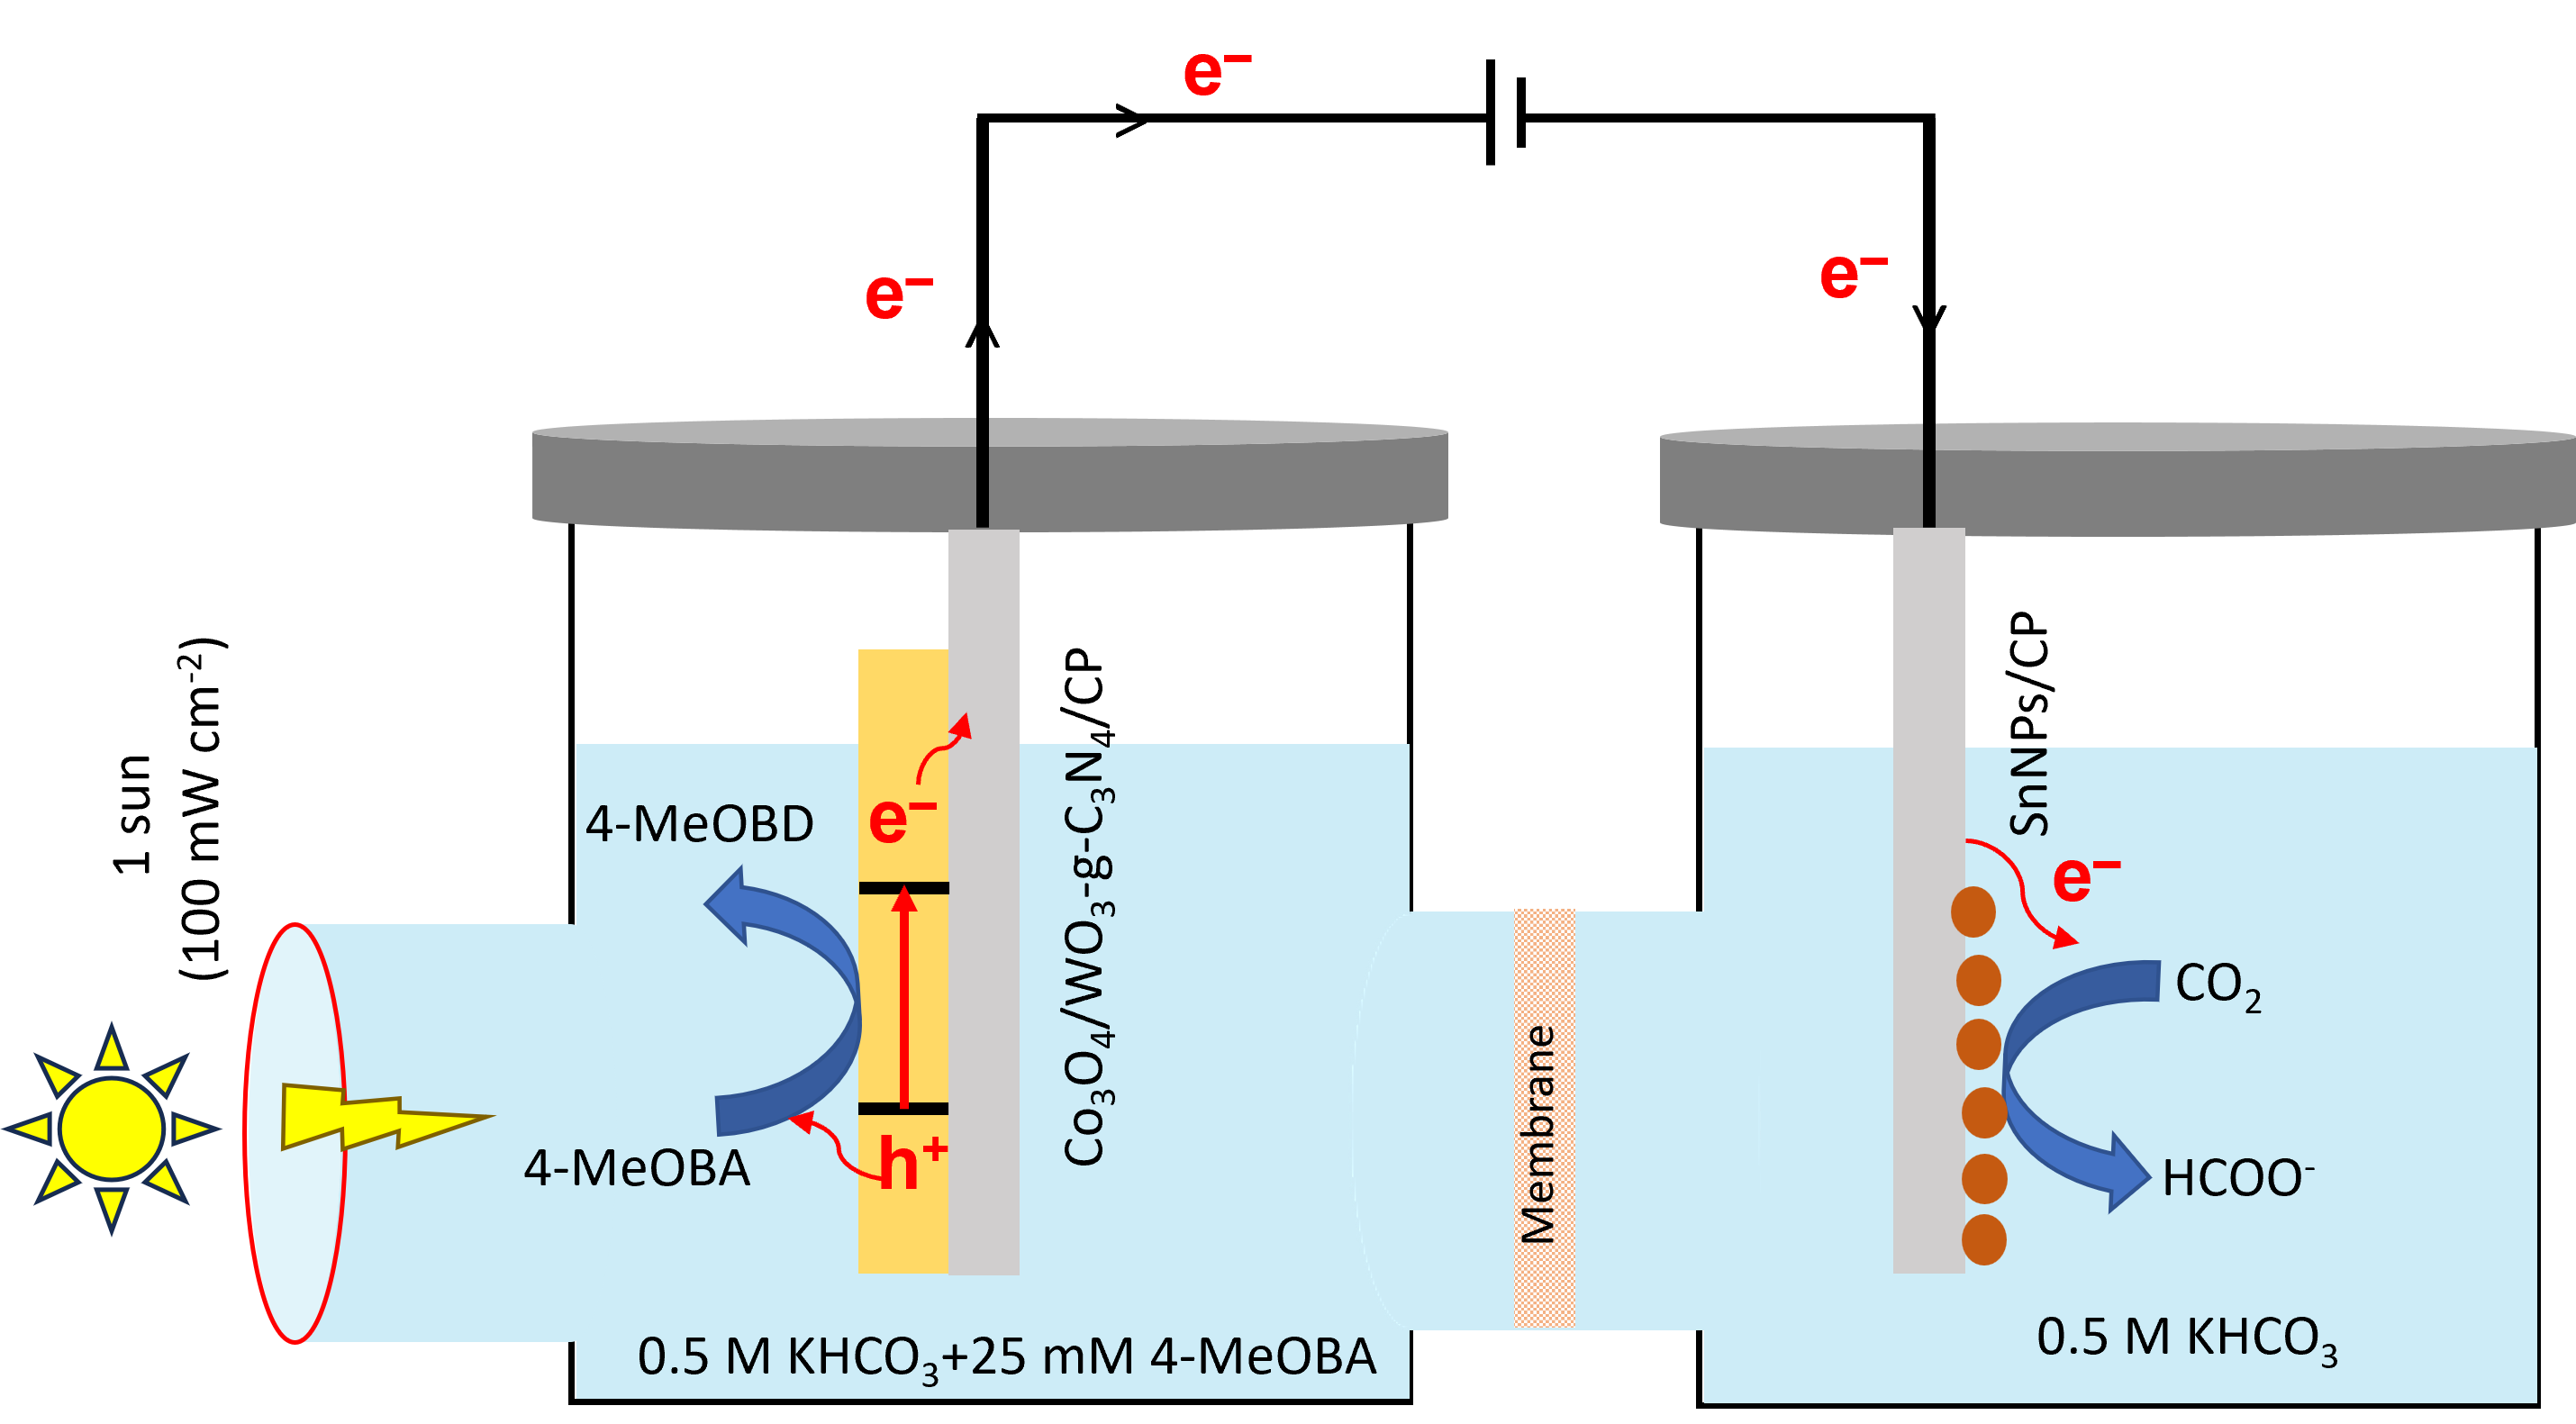
**

**Fig. S1** Schematic representation of the bias-free Co3O4/WO3-g-C3N4/CP |SnNPs/CP tandem PEC system performing CO2 reduction at the cathode and 4-MeOBA oxidation at the photoanode under simulated solar light irradiation.


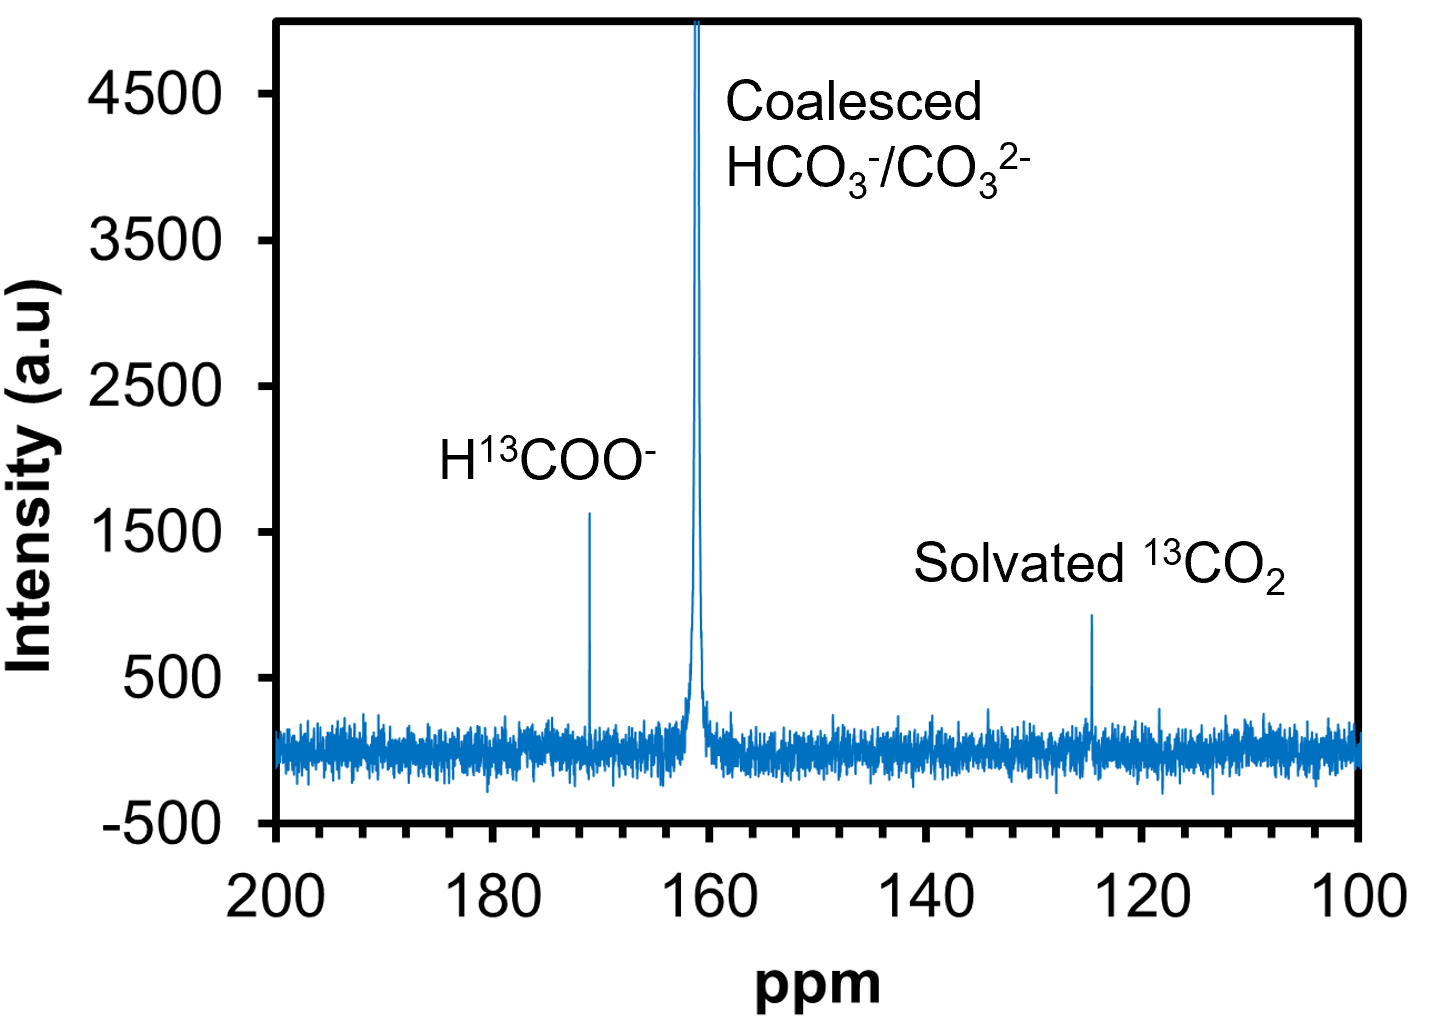


**Fig. S2** ¹³C NMR spectrum of the liquid product from the PEC CO₂ reduction experiment in 0.5 M KHCO3 electrolyte fed with ¹³CO₂ gas. The characteristic ¹³C signal at ~171 ppm confirms the formation of ¹³C-labeled formate, indicating that formate originates from the reduction of CO₂.


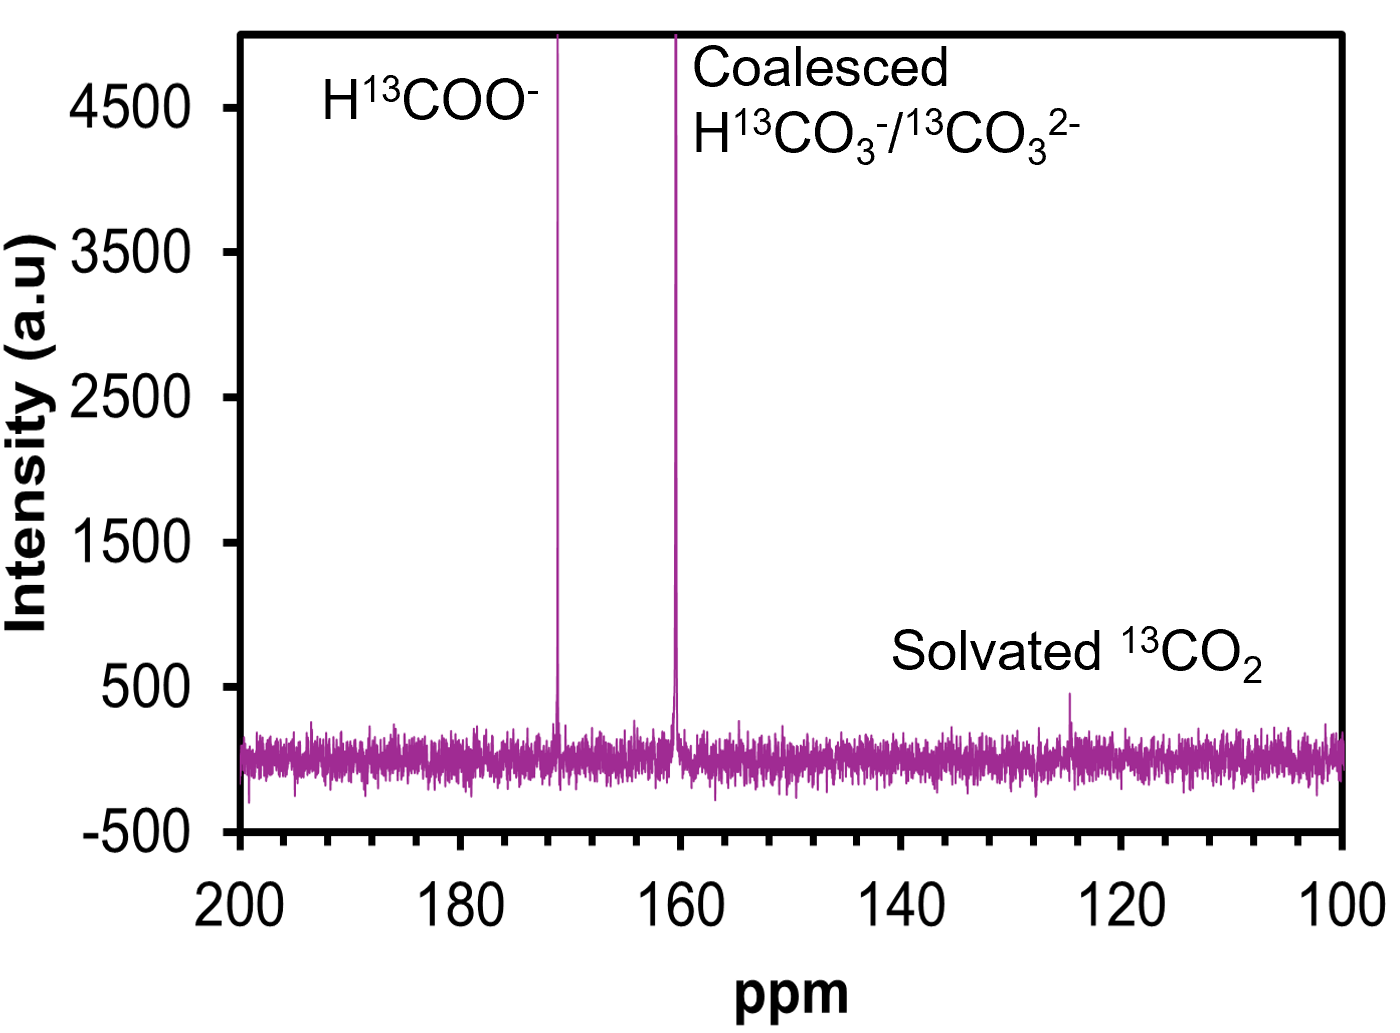


**Fig. S3** ¹³C NMR spectrum of the liquid product from the PEC CO₂ reduction experiment in 0.5 M Na2SO4 electrolyte fed with ¹³CO₂ gas. The characteristic ¹³C signal at ~171 ppm confirms the formation of ¹³C-labeled formate, indicating that formate originates from the reduction of CO₂.

**XRD analysis of g-C3N4/WO3 hybrid material**

X-ray diffraction (XRD) analysis confirmed the coexistence of both components in the hybrid material. A sharp diffraction peak at 27.8° (**Fig. S4**) corresponds to the (002) plane of g-C3N4 (JCPDS 87-1526), indicative of an interlayer spacing of 0.325 nm20. A smaller peak at 12.9° corresponds to the (100) plane, associated with an in-plane periodicity of 0.68 nm attributed to the tri-s-triazine units. The presence of WO3 was confirmed by three intense peaks at 23.1°, 23.6°, and 24.3°, corresponding to the (002), (020), and (200) planes, respectively (JCPDS: 01-083-0951)21. These results indicate that both semiconductors retain crystalline structures within the hybrid material.


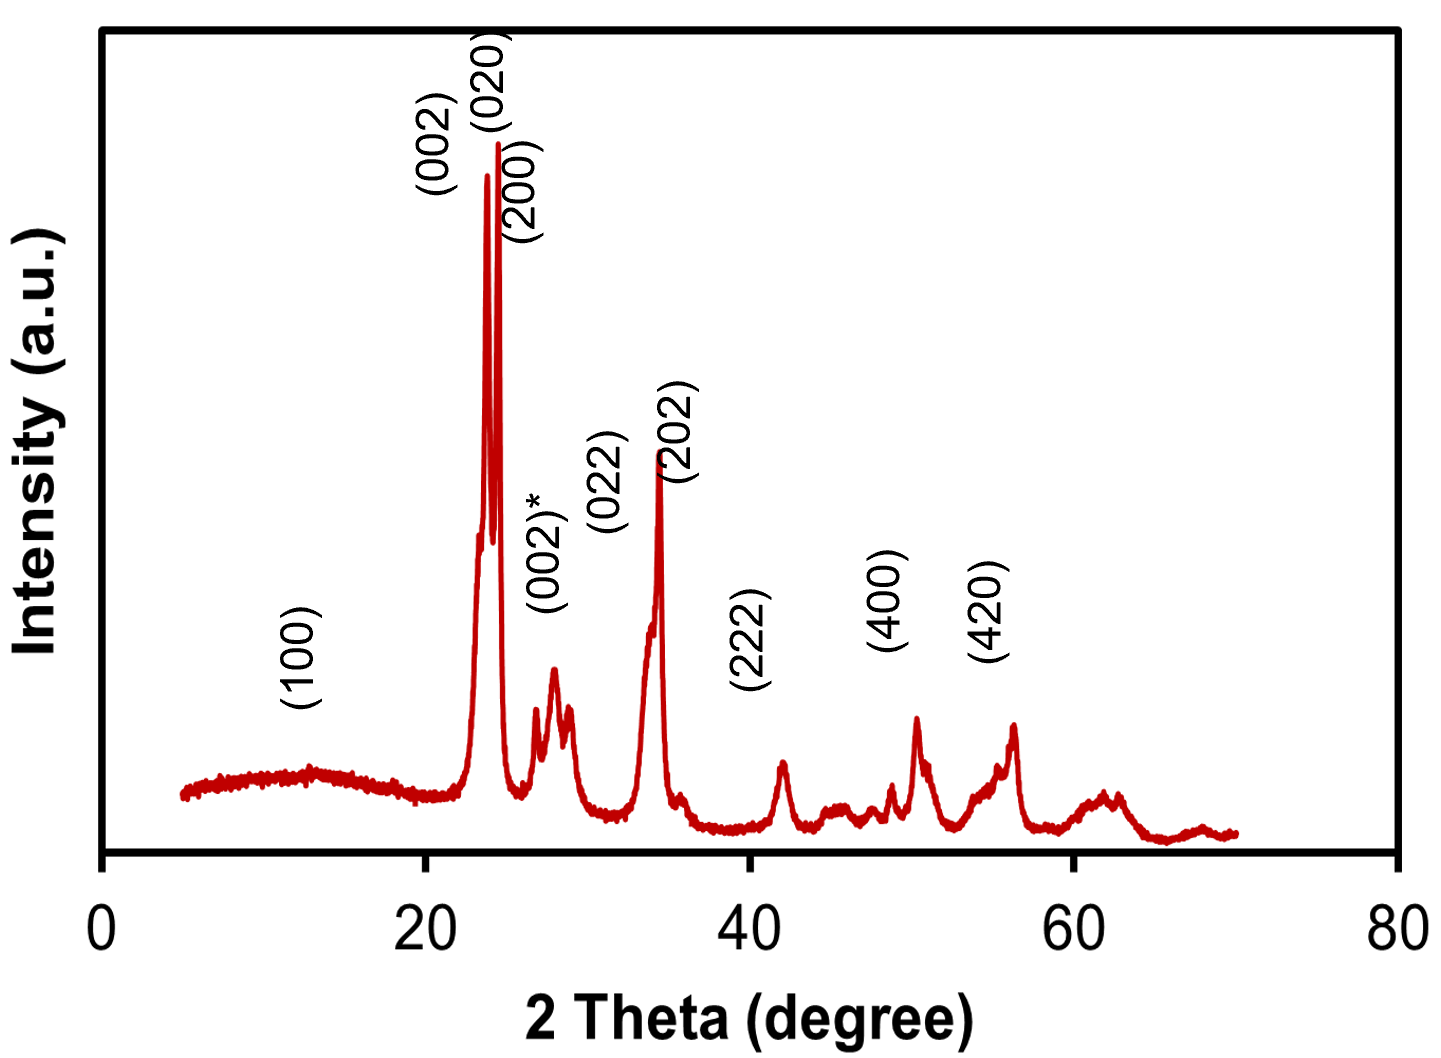


**Fig. S4** XRD pattern of the g-C3N4/WO3 hybrid material

**FTIR analysis of g-C3N4/WO3 hybrid material**

The FTIR spectrum of the g-C3N4/WO3 hybrid displayed characteristic bands from both components. A prominent peak at 810 cm⁻¹ corresponds to the triazine ring breathing mode of g-C3N4, while bands between 1150-1750 cm⁻¹ are assigned to the in-plane stretching vibrations of aromatic rings, indicating the intact g-C3N4 framework. A broad band between 3100-3500 cm⁻¹ suggests the presence of terminal NH and NH₂ groups on the edges of g-C3N4 (**Fig. S5**). For the WO₃ component, characteristic bands were observed at 750 cm⁻¹, corresponding to the O–W–O stretching mode and at 991 cm⁻¹, attributed to the W–OH bending mode.

**
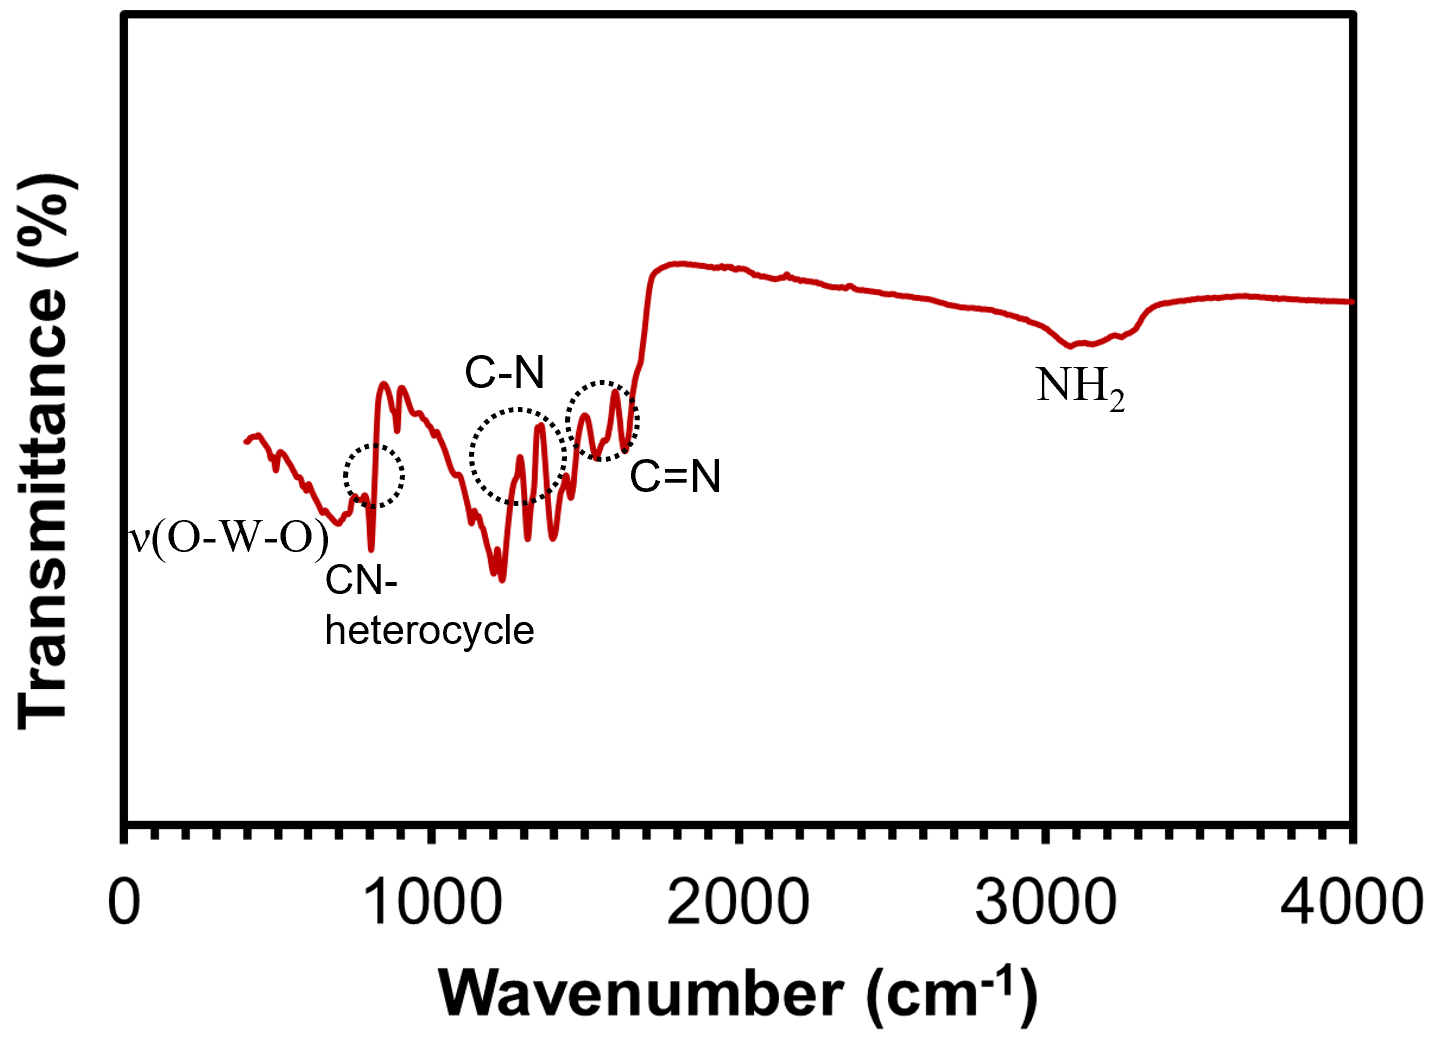
**

**Fig. S5** FTIR spectra of the g-C3N4/WO3 hybrid material


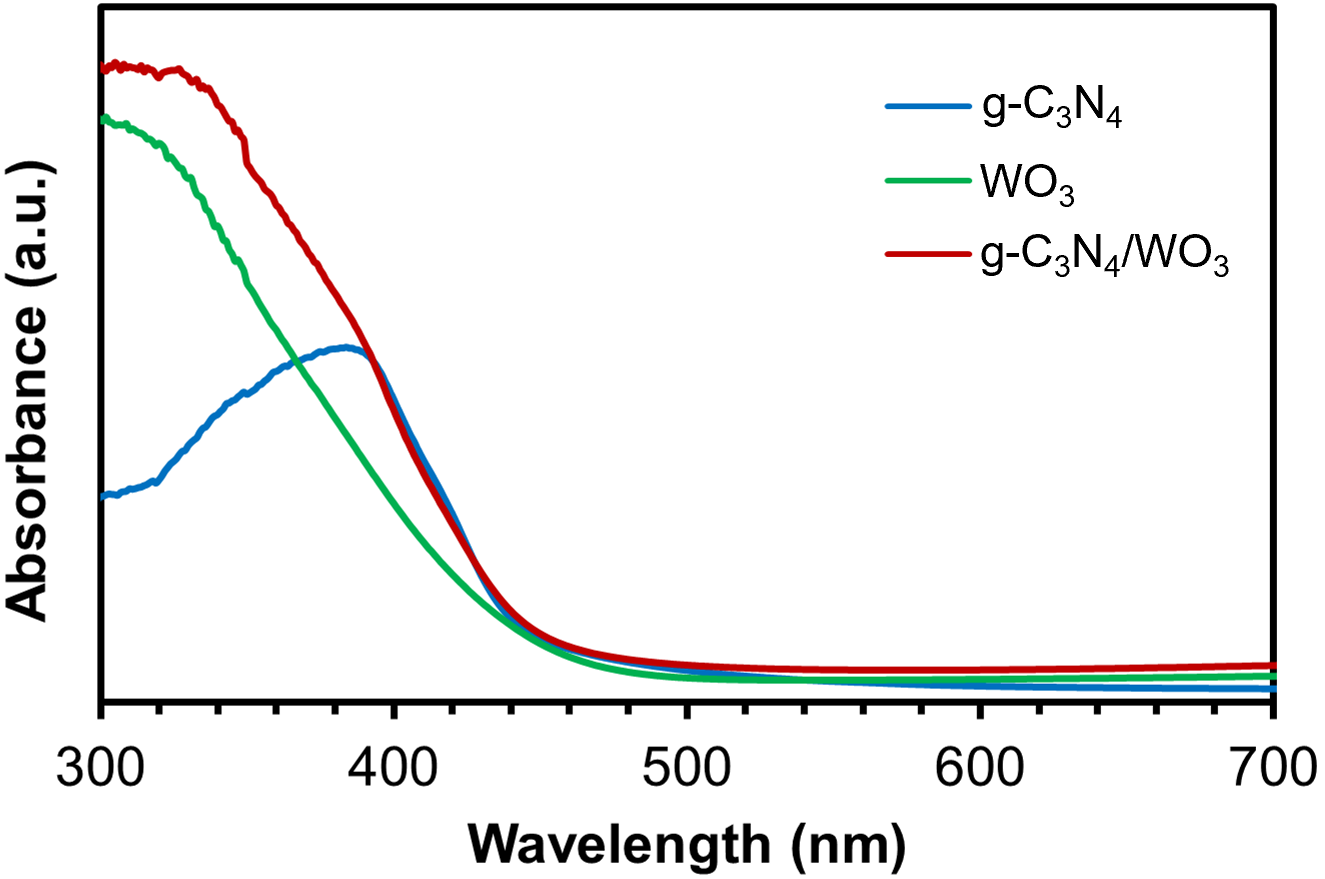


**Fig. S6** UV-Visible absorbance spectra of the g-C3N4, WO3 andg-C3N4/WO3 hybrid materials

**
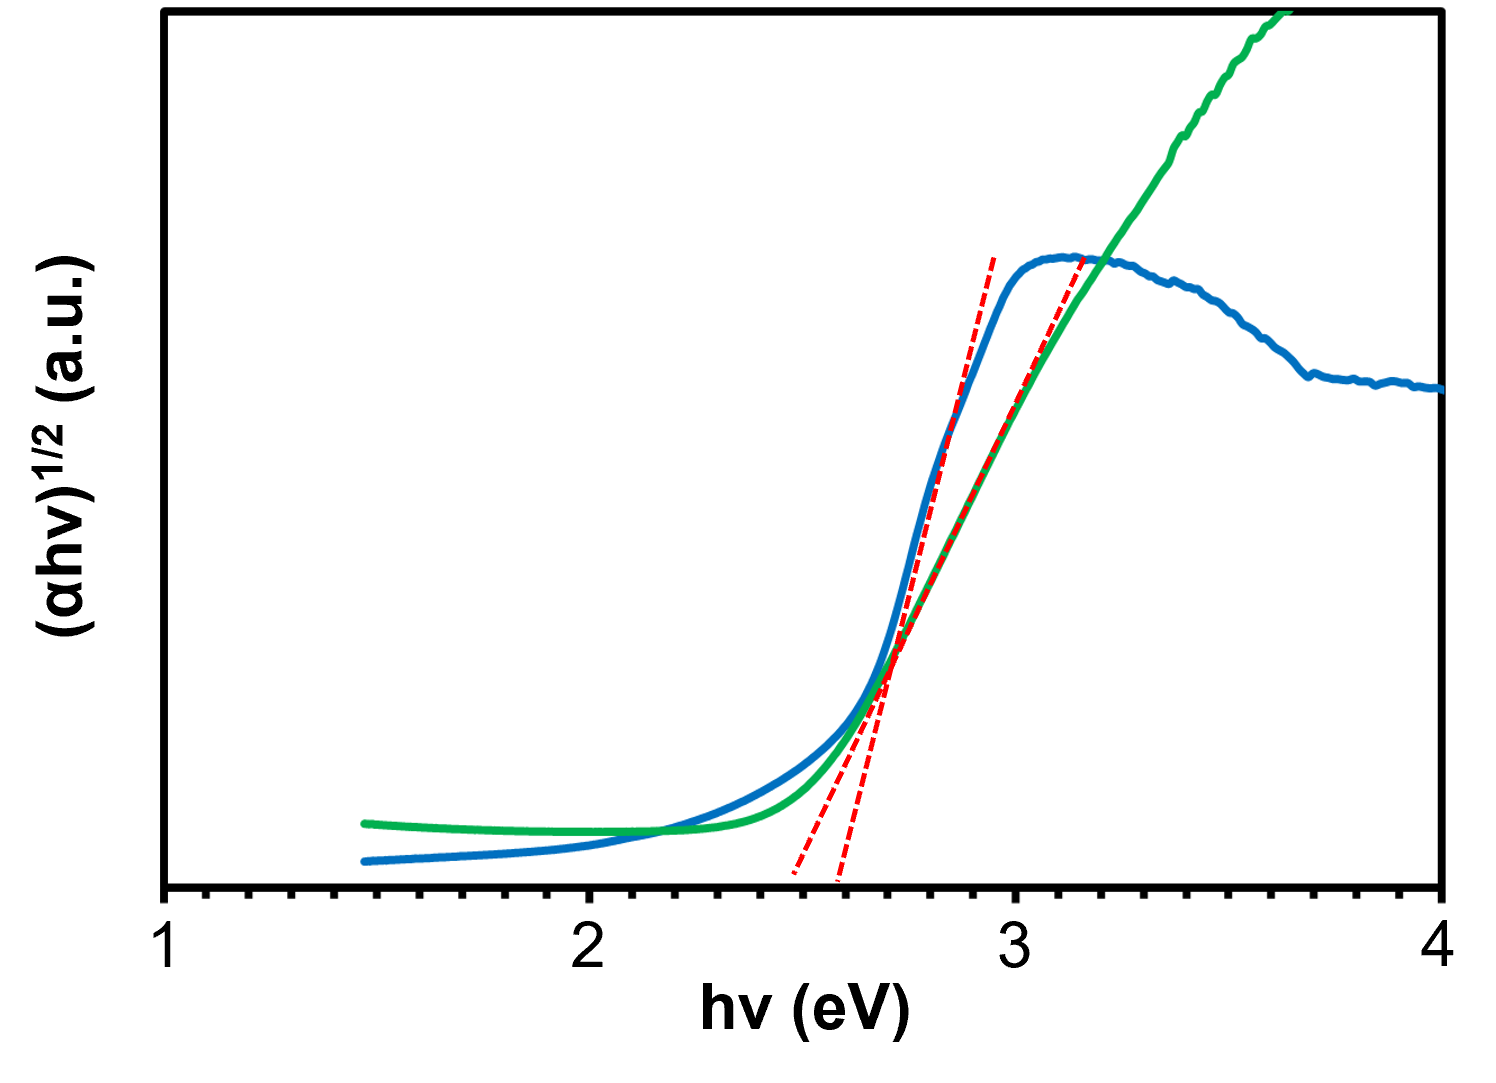
**

**Fig. S7** Tauc plot of the g-C3N4 and WO3

**HR-TEM analysis of g-C3N4/WO3 hybrid material**

High-resolution transmission electron microscopy (HR-TEM) was employed to investigate the interfacial structure of the g-C3N4/WO3 hybrid material in detail. The imaging reveals direct and intimate contact between the two phases, confirming the successful formation of a heterojunction at the nanoscale (**Fig. S8a**). The WO3 phase exhibits higher contrast in HR-TEM images due to the higher atomic number of W. Lattice fringes corresponding to the (100) planes of WO3 are observed to align parallel to the interface with g-C3N4, indicating a well-ordered crystalline structure. The g-C3N4 phase at the interface appears nanocrystalline, comprising randomly oriented domains with sizes on the order of tens of nanometers (**Fig. S8b**). This direct physical contact between g-C3N4 and WO3 domains is expected to be critical in facilitating efficient photoinduced charge transfer across the n-n heterojunction. Such interfacial connectivity is essential for enhancing charge separation and reducing recombination losses, thereby improving the overall performance of the photoelectrode.


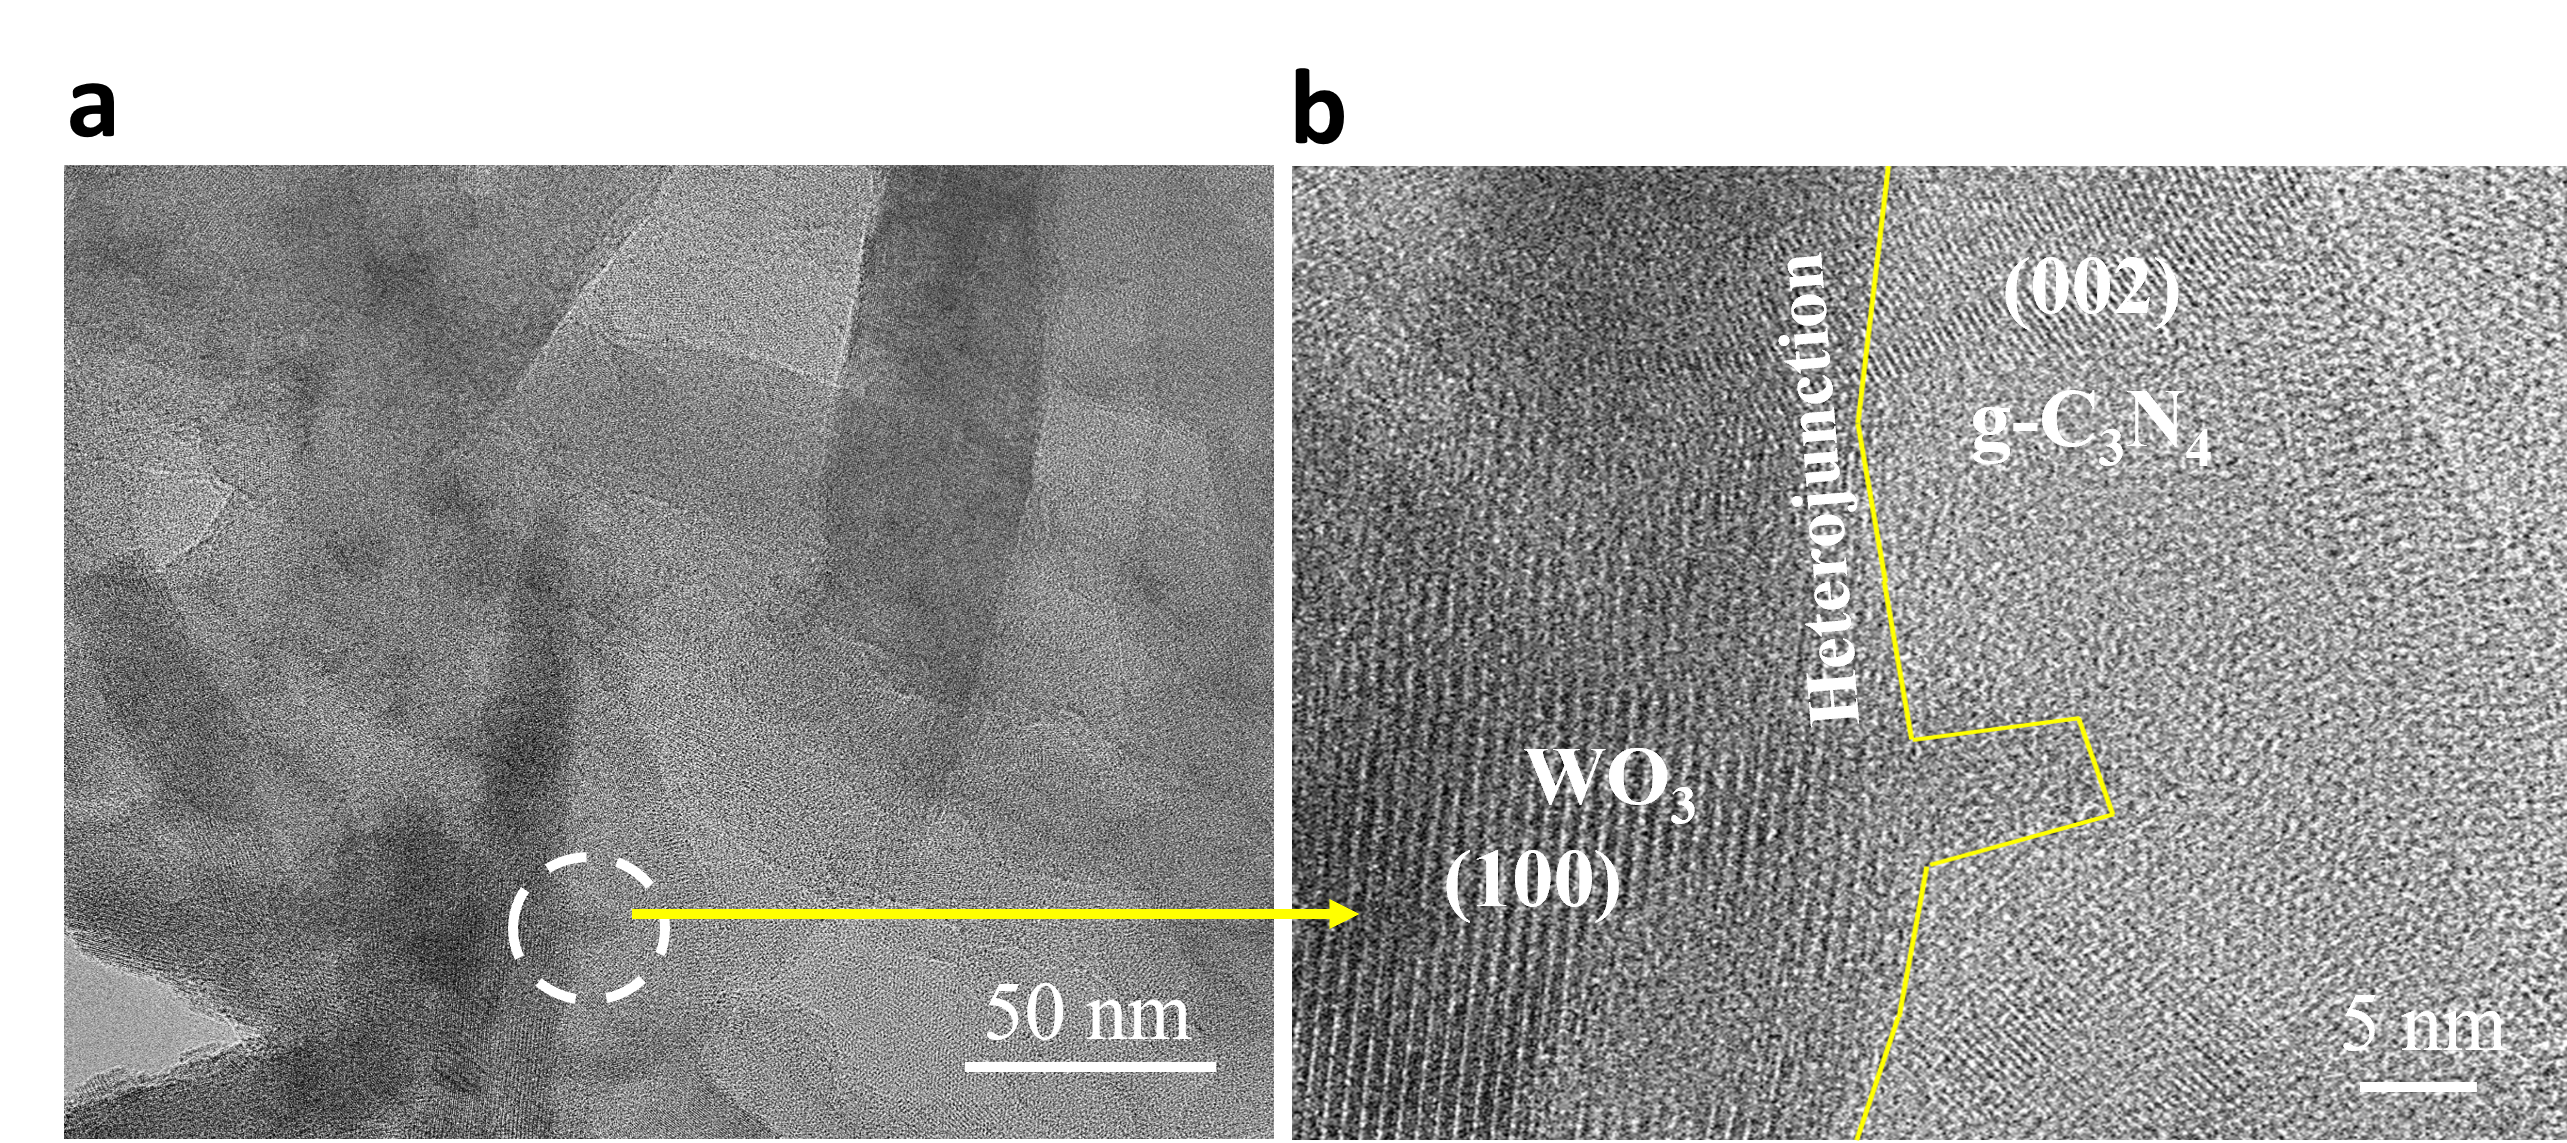


**Fig. S8** a) low magnification and b) high magnification HR-TEM images of the g-C3N4/WO3 hybrid material.


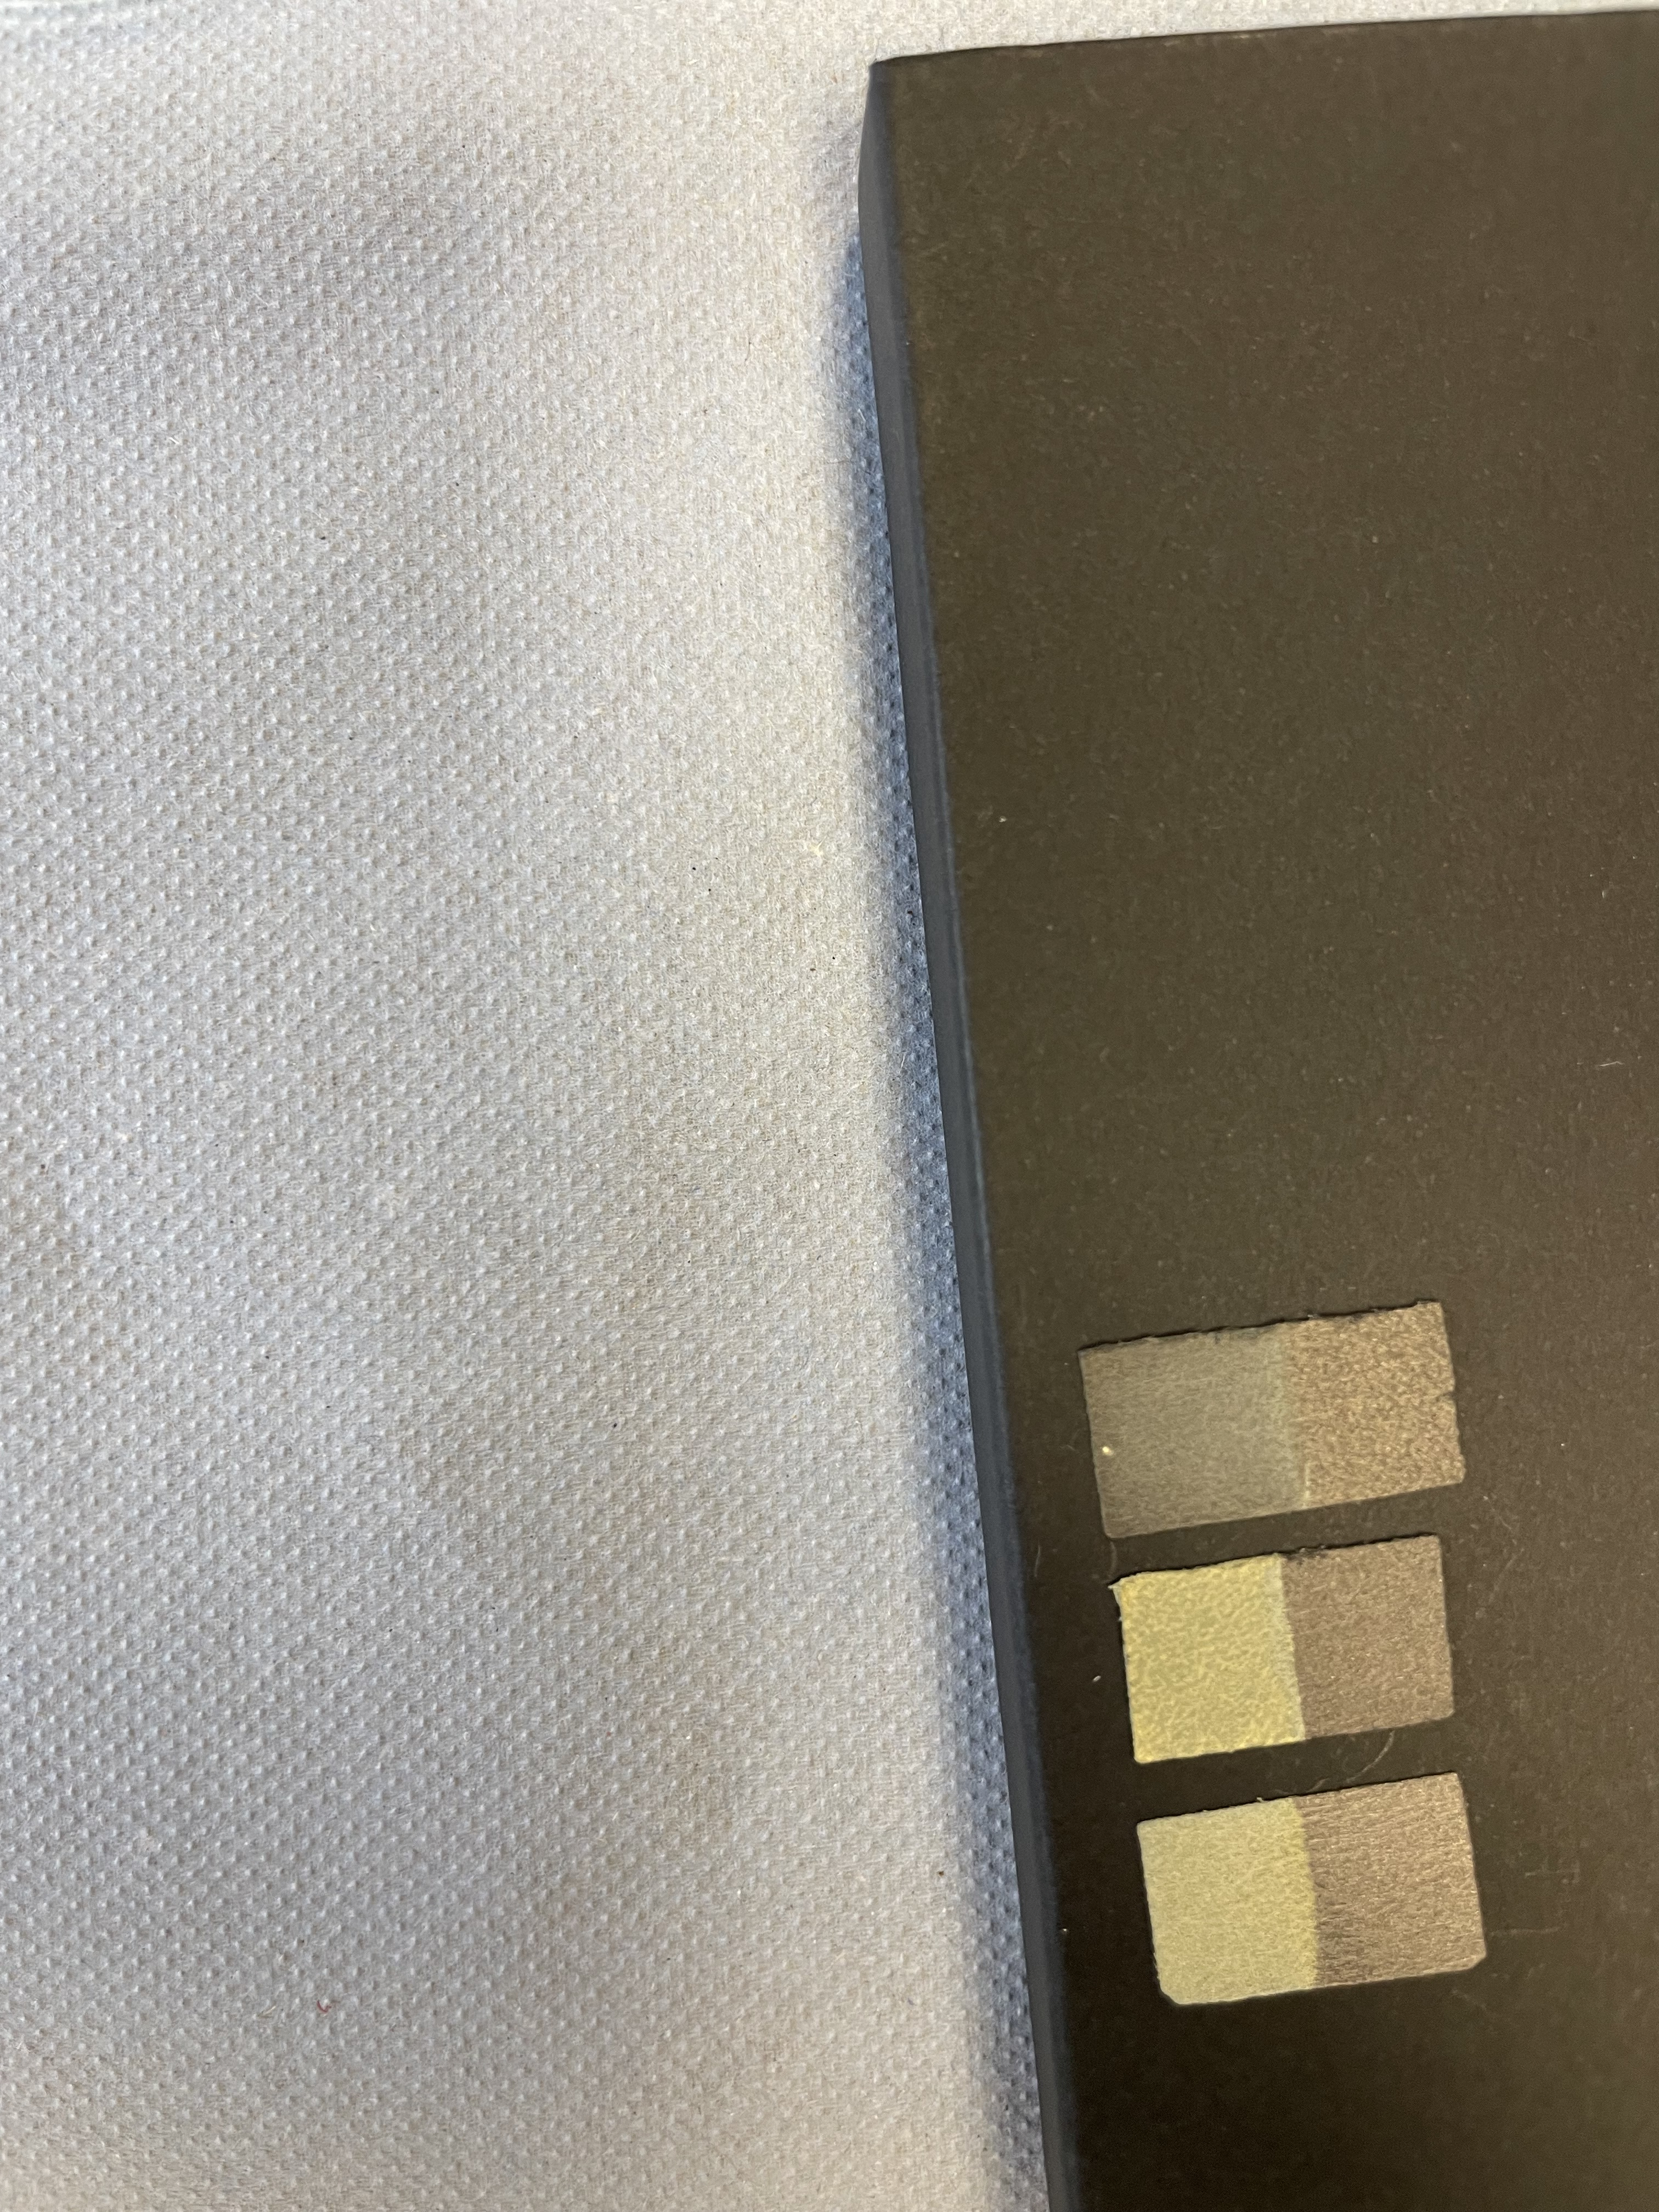


**Fig. S9** EPD-coated thin film of g-C3N4/WO3


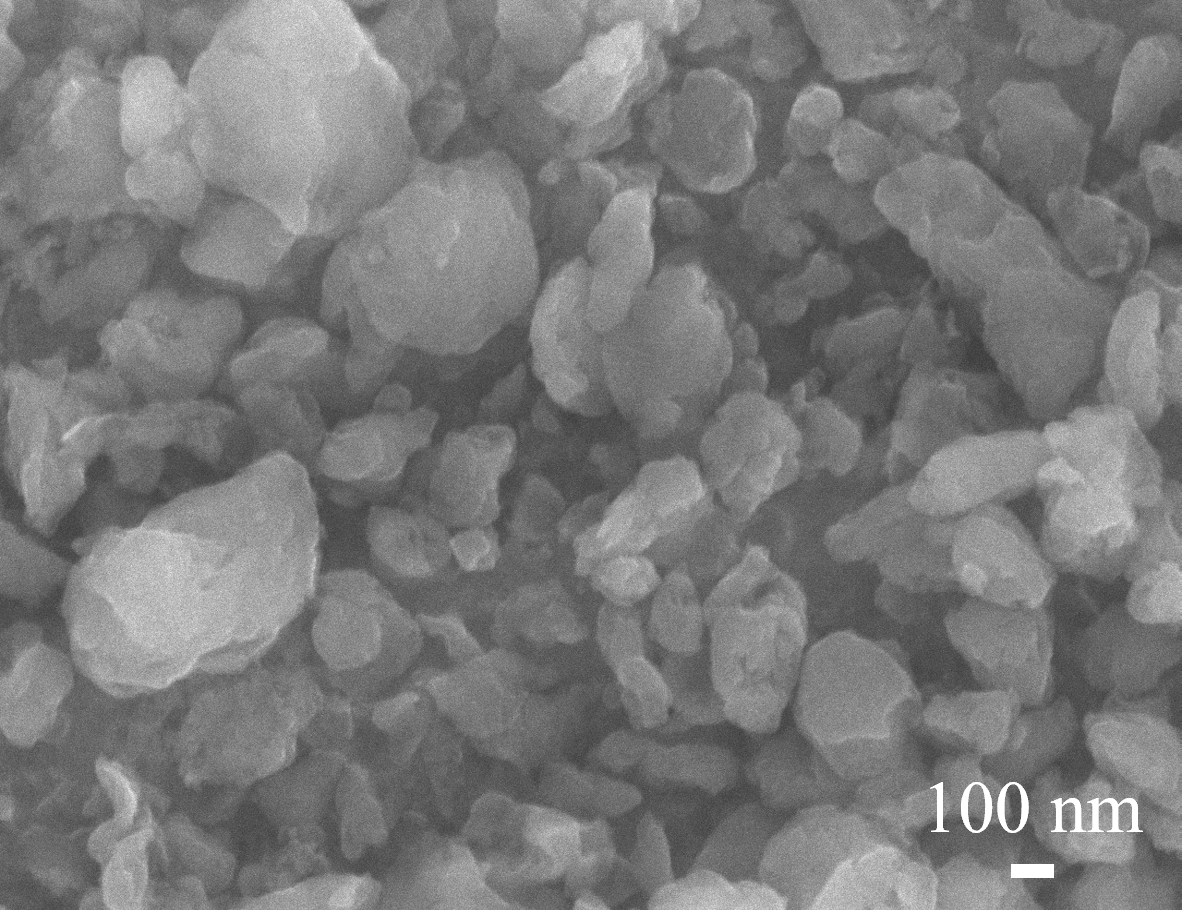


**Fig. S10.** SEM image of g-C3N4 thin film on CP


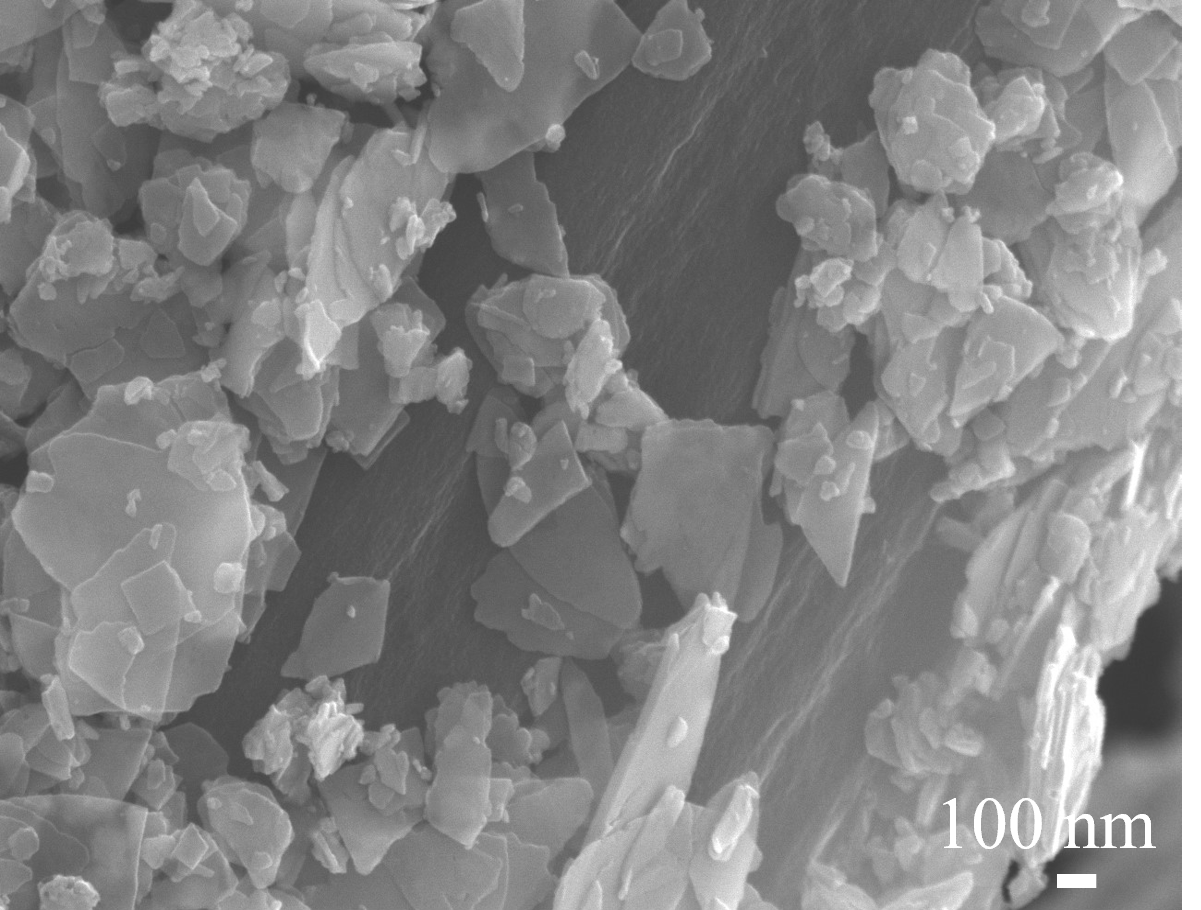


**Fig. S11.** SEM image of WO3 thin film on CP

**X-ray photoelectron spectroscopy (XPS)**


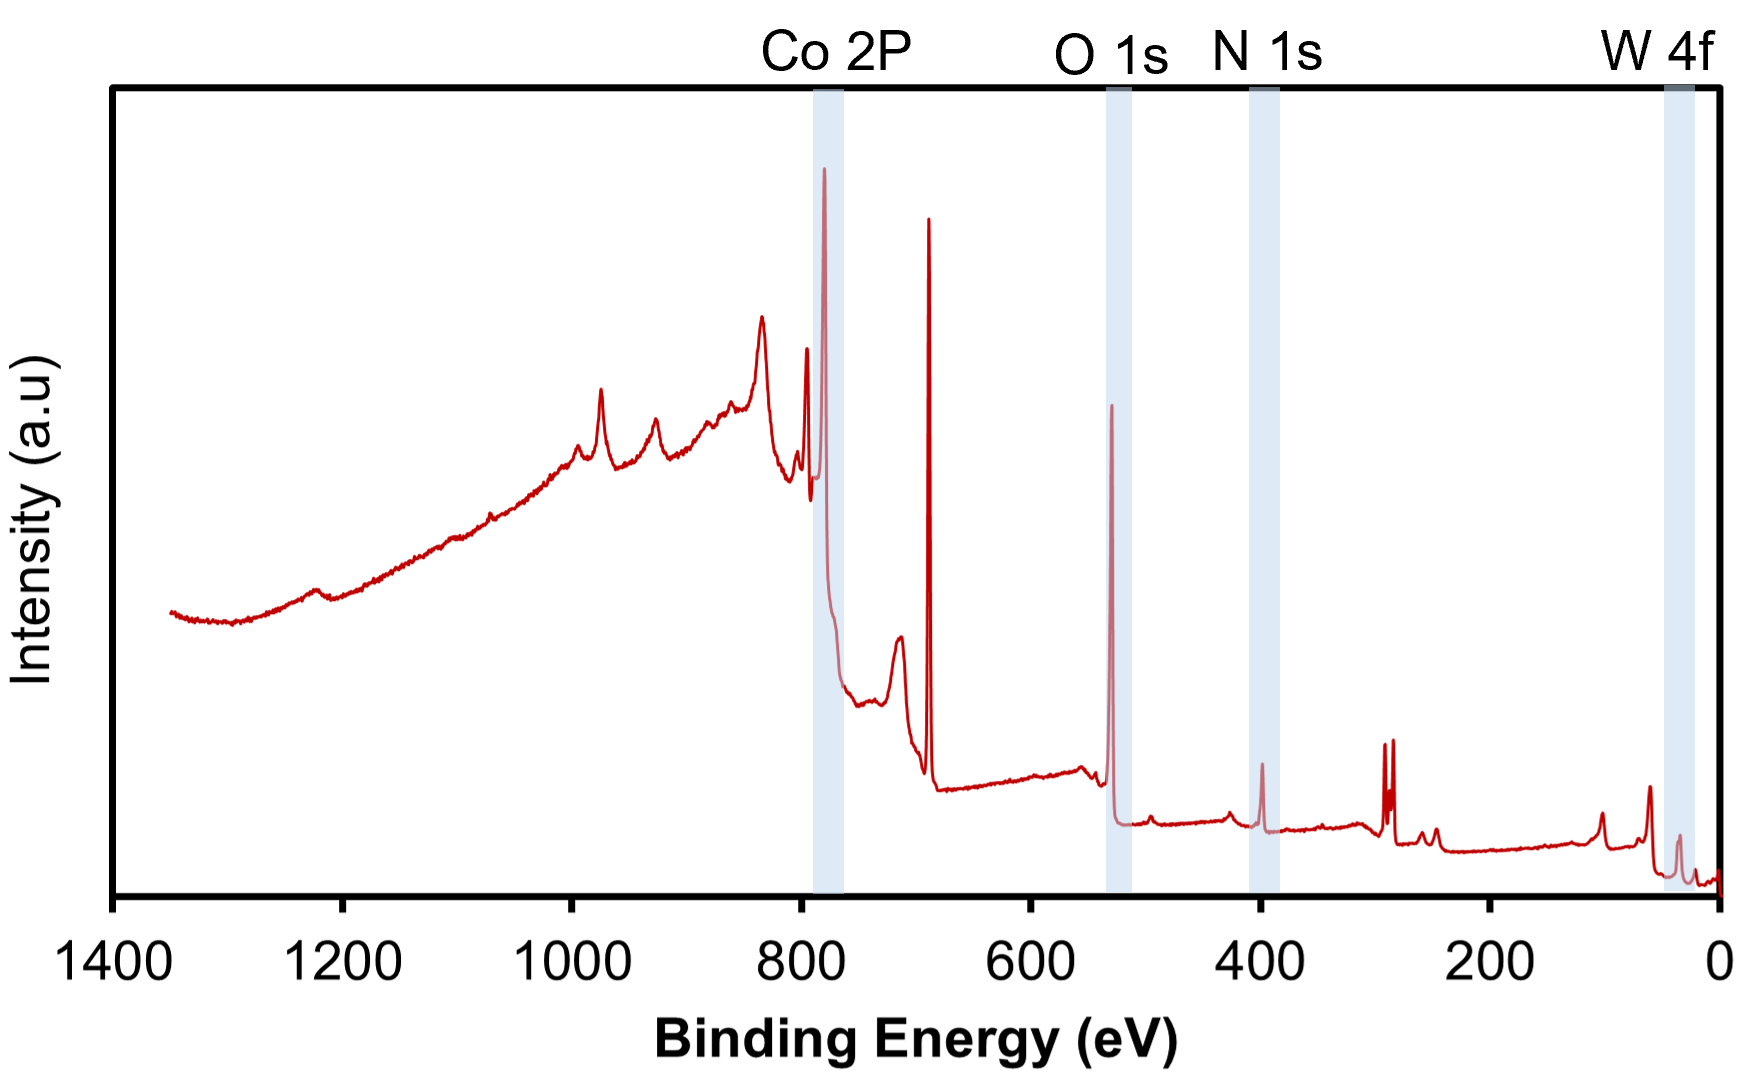


**Fig. S12** XPS survey spectra of Co3O4/WO3/g-C3N4/CP

X-ray photoelectron spectroscopy measurements were performed using a Thermo Scientific K-Alpha spectrometer equipped with a monochromatic Al Kα radiation source operating at 72 W (6 mA × 12 kV). The analysis area was approximately 400 × 600 microns, and all experimental conditions are detailed in Table S1. All samples were analysed using a dual ion-electron charge compensation detector, operating at an argon background pressure of 10⁻⁷ mbar. Samples were mounted by pressing them onto silicone-free, double-sided adhesive tape. Data processing was conducted using CASAXPS (Version 2.3.27), with charge correction applied to the reference C 1s peak.

**Table S1**. Experimental parameters used for the XPS measurements.

| Region | Pass Energy (eV) | Dwell time (s) | Number of scans | Step energy (eV) |
| --- | --- | --- | --- | --- |
| Survey | 160 | 150 | 2 | 0.2 |
| C 1s | 20 | 60 | 20 | 0.1 |
| O 1s | 20 | 60 | 20 | 0.1 |
| N 1s | 20 | 60 | 20 | 0.1 |
| W 4f | 20 | 150 | 2 | 0.1 |

**Peak model**

The peak model for carbon nitride (g-C3N4) follows the previous work from our group2. A *two-parameter Touggard (U2) background was used to determine fitting parameters for the satellite structure to the higher binding energy.* The N 1s core level spectra, we use the three characteristic peaks for g-C3N4 ascribed to the sp2 hybridised pyridine nitrogen in triazine rings (C=N–C), tertiary nitrogen N–(C)3, and sp3 terminal N (C–N–H), respectively. Also, the bulk material presents 4 satellite peaks observed at higher binding energies. A Lorentzian asymmetric (LA) Voigt type line shapes were used for the analysis of general form LA (α, β, m), where α and β define the spread of the tail on either side of the Lorentzian components and m is an integer between 0 and 499 specifying the width of the Gaussian used to convolute the Lorentzian peak (note the β parameter may be omitted). The fitting parameters used are as follows: LA(1.3, 243) for all peaks, including the satellite structure with the exception of N(1s) peak at 398.7 eV, where LA(1.03,1.24,243) was used. For W 4f and Sn 3d spectra, a simple double separation was attributed. For the C 1s region, due to the dominant contributions of C–C from graphitic carbon and C–F bonds originating from PTFE on the carbon paper, the C 1s spectra were not fitted. Instead, they were used exclusively as an internal reference, using the 284.5 eV peak corresponding to graphitic carbon. The Co 2p follow the previous peak model applied by Biesinger et.al.3 where we used the peak models for Co3O4 and Co(OH)2. We summarised the peak model and the fitting outcome in **Tables S2-S4**.

**Table S2:** Peak model of N 1s spectra for the g-C3N4/CP and WO3/g-C3N4/CP

|  | Assignment | Positions Constraints | FWHM  Constraints | Line shape |
| --- | --- | --- | --- | --- |
| A | N in C–N–C | 398.8 , 398.3 | 0.8 , 1.2 | LA(1.03,1.24,243) |
| B | N in N–[C]3 | A + 1.34 (±0.2) | 0.8 , 1.5 | *LA(1.3, 243)* |
| C | N in C–N–H | A + 2.43 (±0.2) | B * 1 | *LA(1.3, 243)* |
| D | Satellite | 418.9 , 391.8 (±0.2) | 2.0 , 2.7 | *LA(1.3, 243)* |
| E | Satellite | D + 3.1 | C*1 | *LA(1.3, 243)* |
| F | Satellite | D + 5.7 | C*1 | *LA(1.3, 243)* |
| G | Satellite | D + 7.9 | C*1 | *LA(1.3, 243)* |

**Table S3:** Co 2p peak model used for the Co3O4/CP and Co3O4/WO3/g-C3N4/CP

|  | Assignment | Positions Constraints | Area Constraints | FWHM  Constraints | Line shape |
| --- | --- | --- | --- | --- | --- |
| A | Co3O4 | 779 (±0.6) | - | 0.8 , 1.2 | *LA(1.13, 243)* |
| B | Co3O4 | A + 1.32 (±0.2) | A*0.71 | A*1.55 | *LA(1.13, 243)* |
| C | Co3O4 | A + 2.6 (±0.2) | A*0.35 | B * 1 | *LA(1.13, 243)* |
| D | Co3O4 | A + 5.6 (±0.2) | A*0.28 | A*3.2 | *LA(1.13, 243)* |
| E | Co3O4 | A + 9.9 (±0.2) | A*0.21 | A*2.37 | *LA(1.13, 243)* |
| F | Co(OH)2 | 780.7 (±0.3) | - | 0.8 , 2 | *LA(1.13, 243)* |
| G | Co(OH)2 | F + 1.8 | F*0.15 | F*1.25 | *LA(1.13, 243)* |
| H | Co(OH)2 | F + 5.8 | F*0.23 | F*2.2 | *LA(1.13, 243)* |
| J | Co(OH)2 | F+ 9.9 | F*0.06 | F*1.15 | *LA(1.13, 243)* |

**Table S4:** Peak position, FWHM and percentage of different components from the N 1s for the g-C3N4/CP and WO3/g-C3N4/CP.

| **Component ↓** | **Sample →** | g-C3N4/CP | WO3/g-C3N4/CP | Co3O4/WO3/g-C3N4/CP |
| --- | --- | --- | --- | --- |
| N in C–N–C | Position (eV) | 398.27 | 398.45 | 398.6 |
| FWHM (eV) | 1.3 | 1.26 | 1.3 |
| Area (%) | 59.0 | 64.0 | 56.6 |
| N in N–[C]3 | Position (eV) | 399.43 | 399.79 | 399.96 |
| FWHM (eV) | 1.47 | 1.32 | 1.5 |
| Area (%) | 17.0 | 12.3 | 18.1 |
| N in C–N–H | Position (eV) | 400.73 | 400.89 | 401.06 |
| FWHM (eV) | 1.47 | 1.32 | 1.5 |
| Area (%) | 11.2 | 10.2 | 10.0 |
| Satellite | Position (eV) | 404.1 | 404.09 | 404.7 |
| FWHM (eV) | 2.7 | 2.7 | 2.7 |
| Area (%) | 7.6 | 8.3 | 8.4 |
| Satellite | Position (eV) | 407.05 | 407.2 | 407.8 |
| FWHM (eV) | 2.7 | 2.7 | 2.7 |
| Area (%) | 2.6 | 3.0 | 3.1 |
| Satellite | Position (eV) | 409.84 | 409.79 | 410.4 |
| FWHM (eV) | 2.54 | 2.3 | 2.3 |
| Area (%) | 0.8 | 0.4 | 1.0 |
| Satellite | Position (eV) | 412.04 | 411.99 | 412.6 |
| FWHM (eV) | 2.7 | 2.7 | 2.7 |
| Area (%) | 1.8 | 1.8 | 2.9 |

**Table S5:** Peak position, FWHM and percentage of different components from the W 4f 1s for WO3/CP and WO3/g-C3N4/CP

| **Component ↓** | **Sample →** | WO3/CP | WO3/g-C3N4/CP | Co3O4/WO3/g-C3N4/CP |
| --- | --- | --- | --- | --- |
| W 4f 7/2 (W6+) | Position (eV) | 35.89 | 35.22 | 34.9 |
| FWHM (eV) | 0.1.02 | 1.29 | 1.36 |
| Area (%) | 48.83 | 47.6 | 41.9 |
| W 4f 5/2 | Position (eV) | 38.03 | 37.36 | 37.0 |
| FWHM (eV) | 1.03 | 1.21 | 1.49 |
| Area (%) | 37.39 | 34.4 | 37.9 |
| W 4f 7/2 (W5+) | Position (eV) | 34.73 | 33.22 | 33.08 |
| FWHM (eV) | 1.36 | 2.0 | 2.0 |
| Area (%) | 5.98 | 8.3 | 10.0 |
| W 4f 5/2 | Position (eV) | 37.07 | 35.72 | 35.38 |
| FWHM (eV) | 1.33 | 2.1 | 2.03 |
| Area (%) | 4.48 | 6.2 | 6.9 |
| W 3p | Position (eV) | 41.60 | 41.43 | 40.56 |
| FWHM (eV) | 1.91 | 1.68 | 2.5 |
| Area (%) | 3.3 | 3.5 | 3.3 |
| **Summary** | **%W 6+** | **89.1** | **85.15** | **80.7** |
| **% W 5+** | **10.9** | **14.85** | **19.3** |

**Table S6:** Peak position, FWHM and percentage of different components from the Co 2p for Co3O4/CP and Co3O4/WO3/g-C3N4/CP

| **Component ↓** | **Sample →** | Co3O4/CP | Co3O4/WO3/g-C3N4/CP |
| --- | --- | --- | --- |
| Co3O4 | Position (eV) | 779.6 | 779.7 |
| FWHM (eV) | 1.41 | 1.42 |
| Area (%) | 32.15 | 29.07 |
| Co3O4 | Position (eV) | 780.9 | 780.96 |
| FWHM (eV) | 2.22 | 2.23 |
| Area (%) | 22.75 | 20.57 |
| Co3O4 | Position (eV) | 782.18 | 782.26 |
| FWHM (eV) | 2.22 | 2.24 |
| Area (%) | 11.45 | 10.35 |
| Co3O4 | Position (eV) | 785.1 | 785.26 |
| FWHM (eV) | 4.53 | 4.55 |
| Area (%) | 9.13 | 8.25 |
| Co3O4 | Position (eV) | 789.58 | 789.56 |
| FWHM (eV) | 2.37 | 3.37 |
| Area (%) | 6.68 | 6.04 |
| Co(OH)2 | Position (eV) | 780.74 | 780.72 |
| FWHM (eV) | 1.73 | 1.87 |
| Area (%) | 15.35 | 17.71 |
| Co(OH)2 | Position (eV) | 782.56 | 782.52 |
| FWHM (eV) | 2.17 | 2.34 |
| Area (%) | 0.97 | 2.79 |
| Co(OH)2 | Position (eV) | 786.6 | 786.55 |
| FWHM (eV) | 3.80 | 4.10 |
| Area (%) | 1.21 | 4.10 |
| Co(OH)2 | Position (eV) | 790.74 | 790.70 |
| FWHM (eV) | 1.98 | 2.14 |
| Area (%) | 0.1 | 1.11 |
| Summary | **% Co3O4** | **82.2** | **74.3** |
| **% Co(OH)2** | **17.8** | **25.7** |


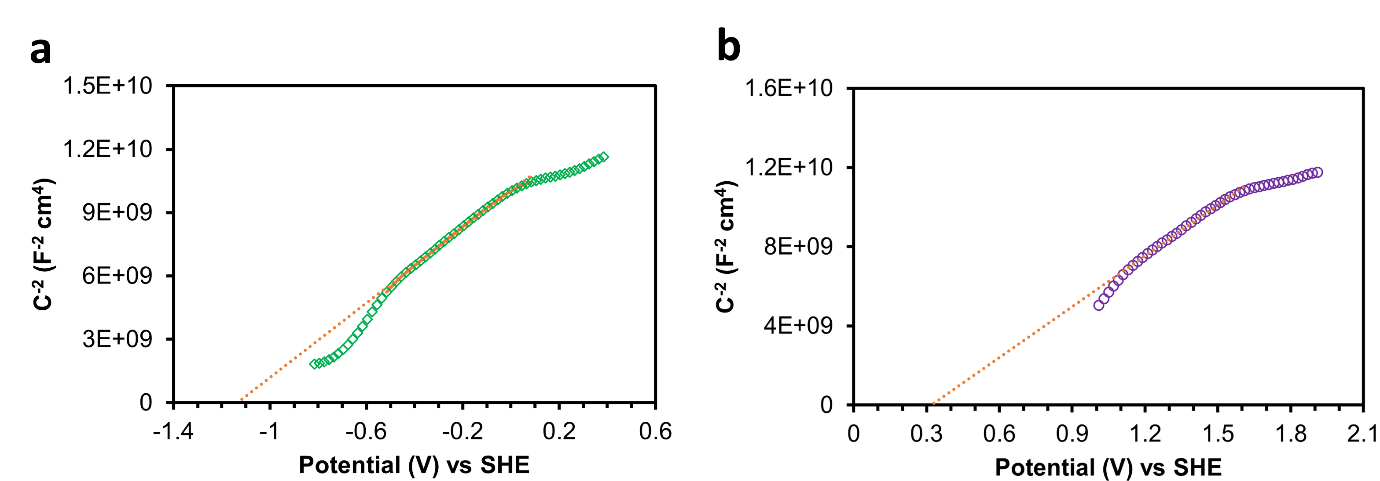


**Fig. S13** Mott-Schottky plot of g-C3N4 obtained by measuring the impedance at the interface by sweeping the potential from negative to positive with a stepping voltage of 50 mV within the frequency range 1000-10000 in degassed 0.5 M Na2SO4 electrolyte.


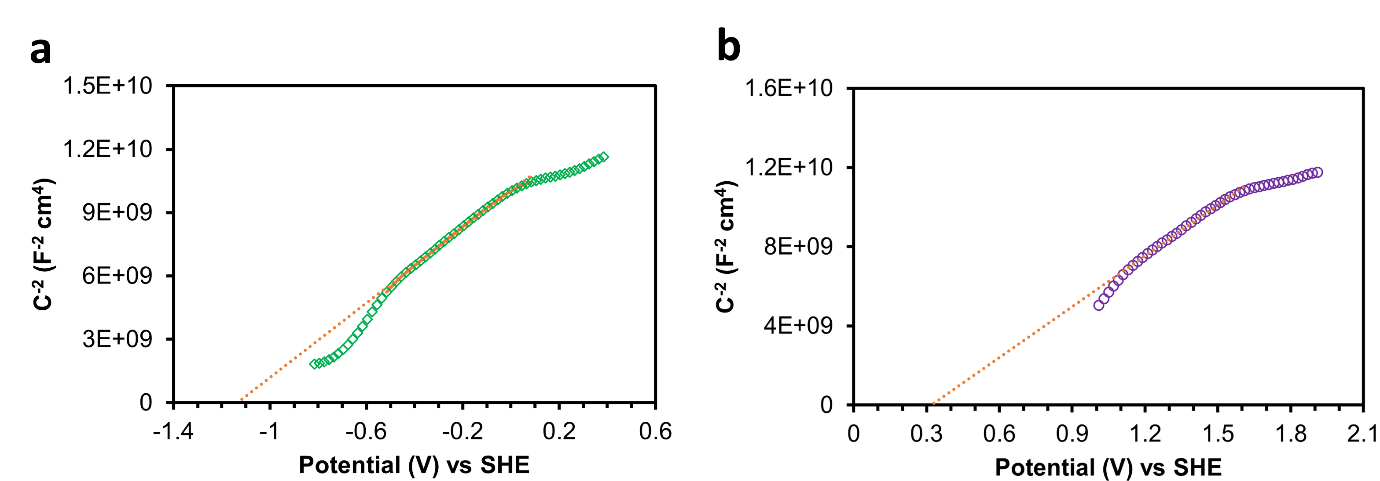


**Fig. S14** Mott-Schottky plot of WO3 obtained by measuring the impedance at the interface by sweeping the potential from negative to positive with a stepping voltage of 50 mV within the frequency range 1000-10000 in degassed 0.5 M Na2SO4 electrolyte.


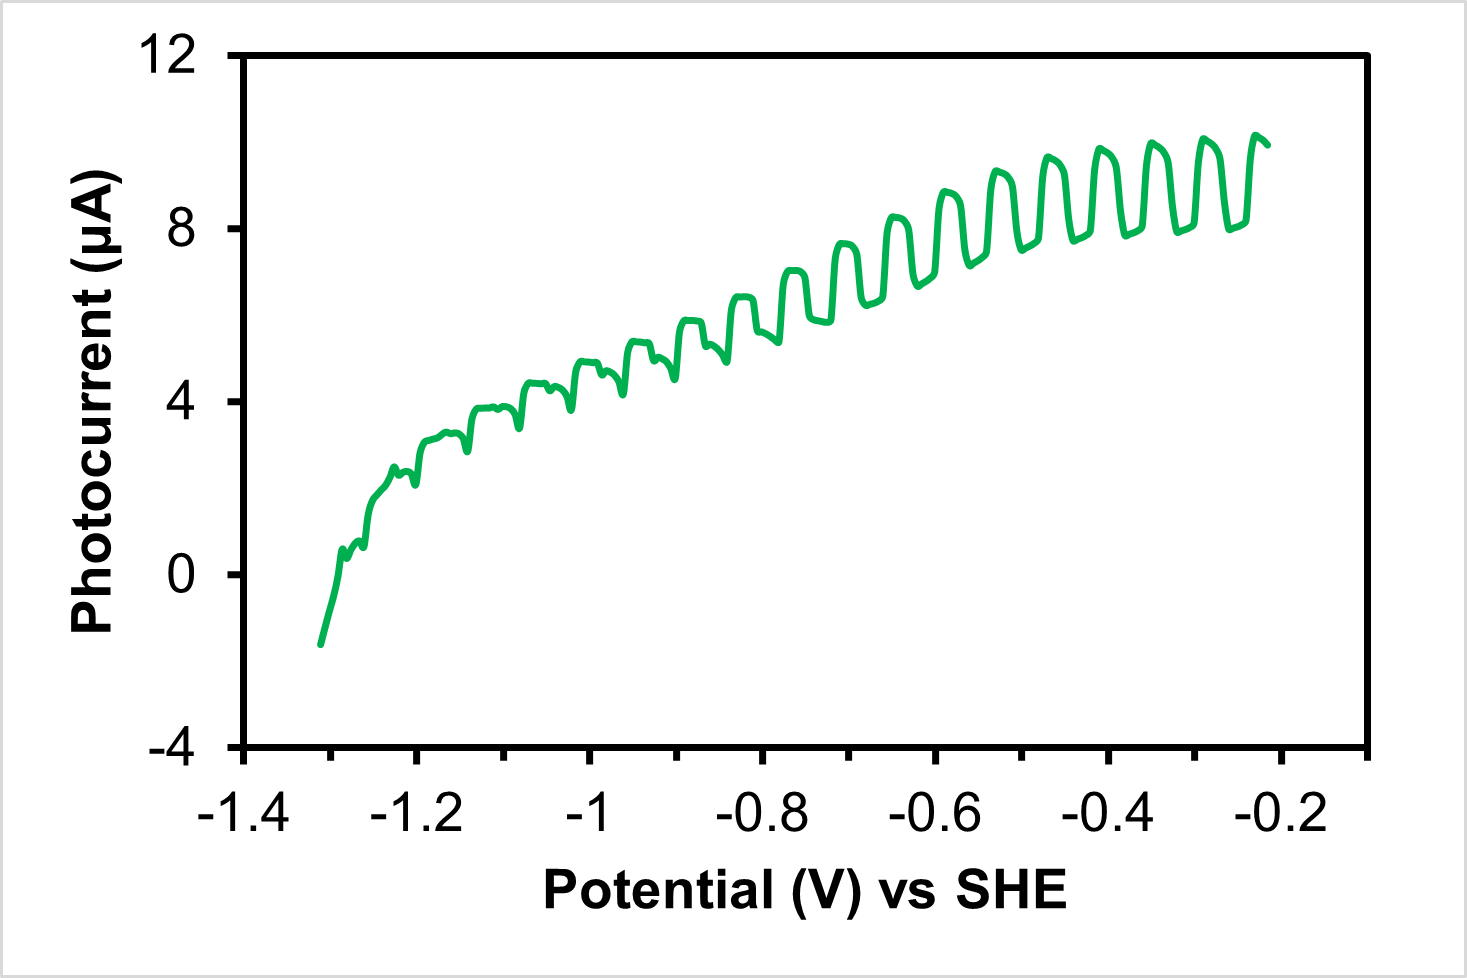


**Fig. S15** Photocurrent onset potential measurements of g-C3N4/CP measured by running linear sweep voltammetry in cathodic direction under chopped light irradiation (100 mW cm-2) in degassed 0.5 M Na2SO4 electrolyte containing 10% TEOA. *Note*: Due to the nanocrystalline nature of the g-C3N4, this measurement requires a hole scavenger because, in this case, the charge separation is not controlled by the space-charge region20.


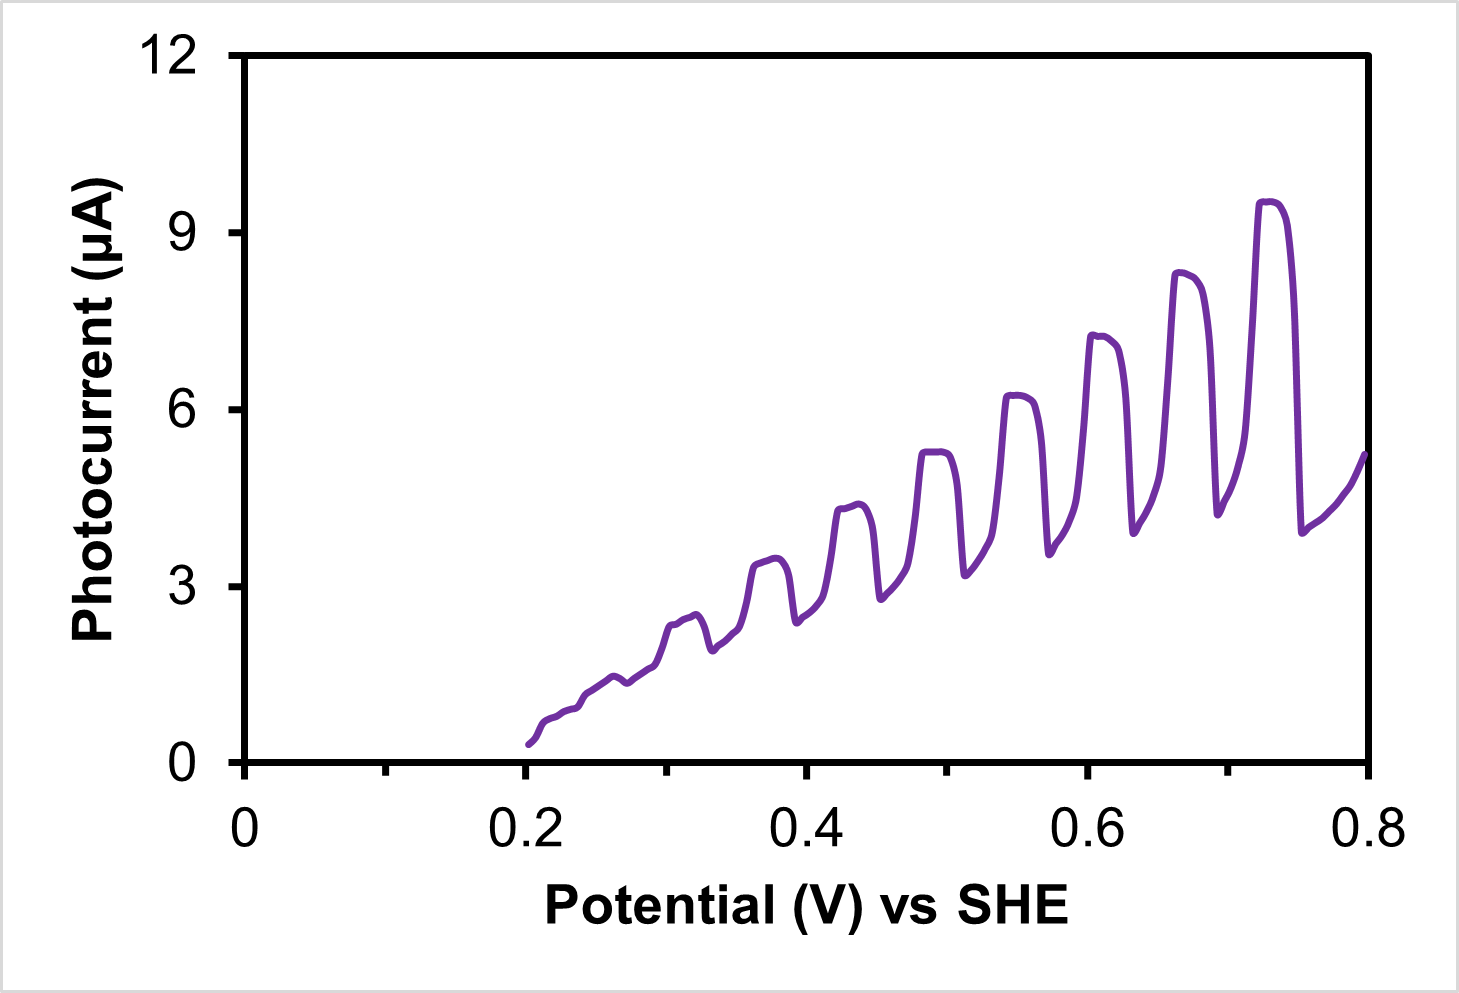


**Fig. S16** Photocurrent onset potential measurements of WO3/CP measured by running linear sweep voltammetry in cathodic direction under chopped light irradiation (100 mW cm-2) in degassed 0.5 M Na2SO4 electrolyte containing 10% TEOA. *Note*: Due to the nanocrystalline nature of the WO3, this measurement requires a hole scavenger because in this case, the charge separation is not controlled by the space-charge region20.

**Estimation of conduction band potential of** **g-C3N4**

The CB potential of the materials was estimated analytically using equation 1, by following the earlier report1.

(1)

Where, EA = Electron affinity

UCB = Conduction band potential

U0SHE = standard potential of physical scale to absolute scale = 4.44 eV

ΔφH = Helm-Holtz potential drop

The conduction band potential can be obtained by rewriting equation 1

The Helm-Holtz potential drop is calculated by

The point of zero charge (pH pzc) for g-C3N4 is pH 6.5. Therefore,

The electron affinity of g-C3N4 is approximately -3.2 eV, which is independent of pH.

**Estimation of conduction band potential of WO3**

The electron affinity of WO3 is -4.8 eV, which is independent of pH

The point of zero charge (pH pzc) for WO3 is pH 0.5.


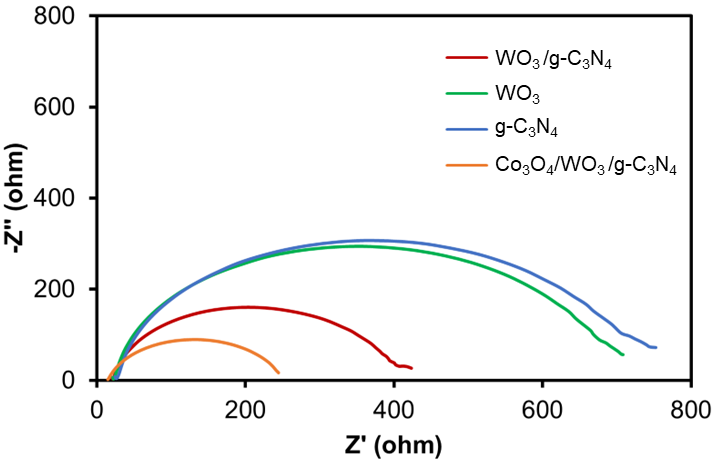


**Fig. S17** Nyquist plots of g-C3N4,WO3, WO3/g-C3N4 and Co3O4/WO3/g-C3N4 obtained in 0.5 M KHCO3 electrolyte at a constant potential of 1.1 V vs Ag/AgCl within the frequency range from 100 kHz to 1 Hz and amplitude of 10 mV.


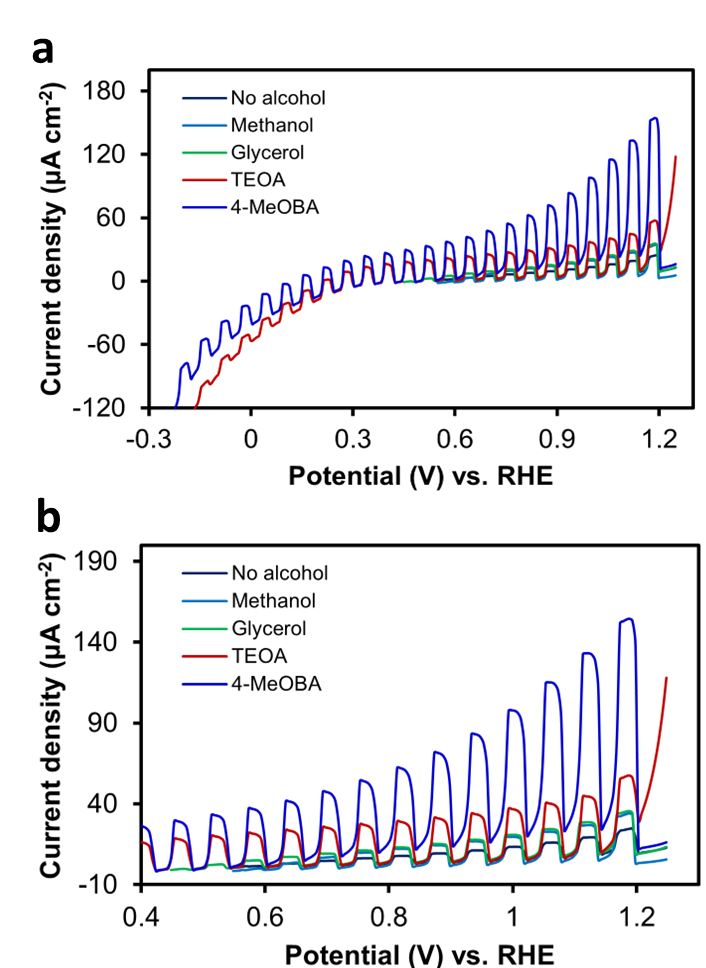


**Fig. S18** a) LSV of Co3O4/WO3/g-C3N4/CP obtained in 0.5 M KHCO3 containing 25 mM of methanol, glycerol, TEOA, and 4-MeOBA.


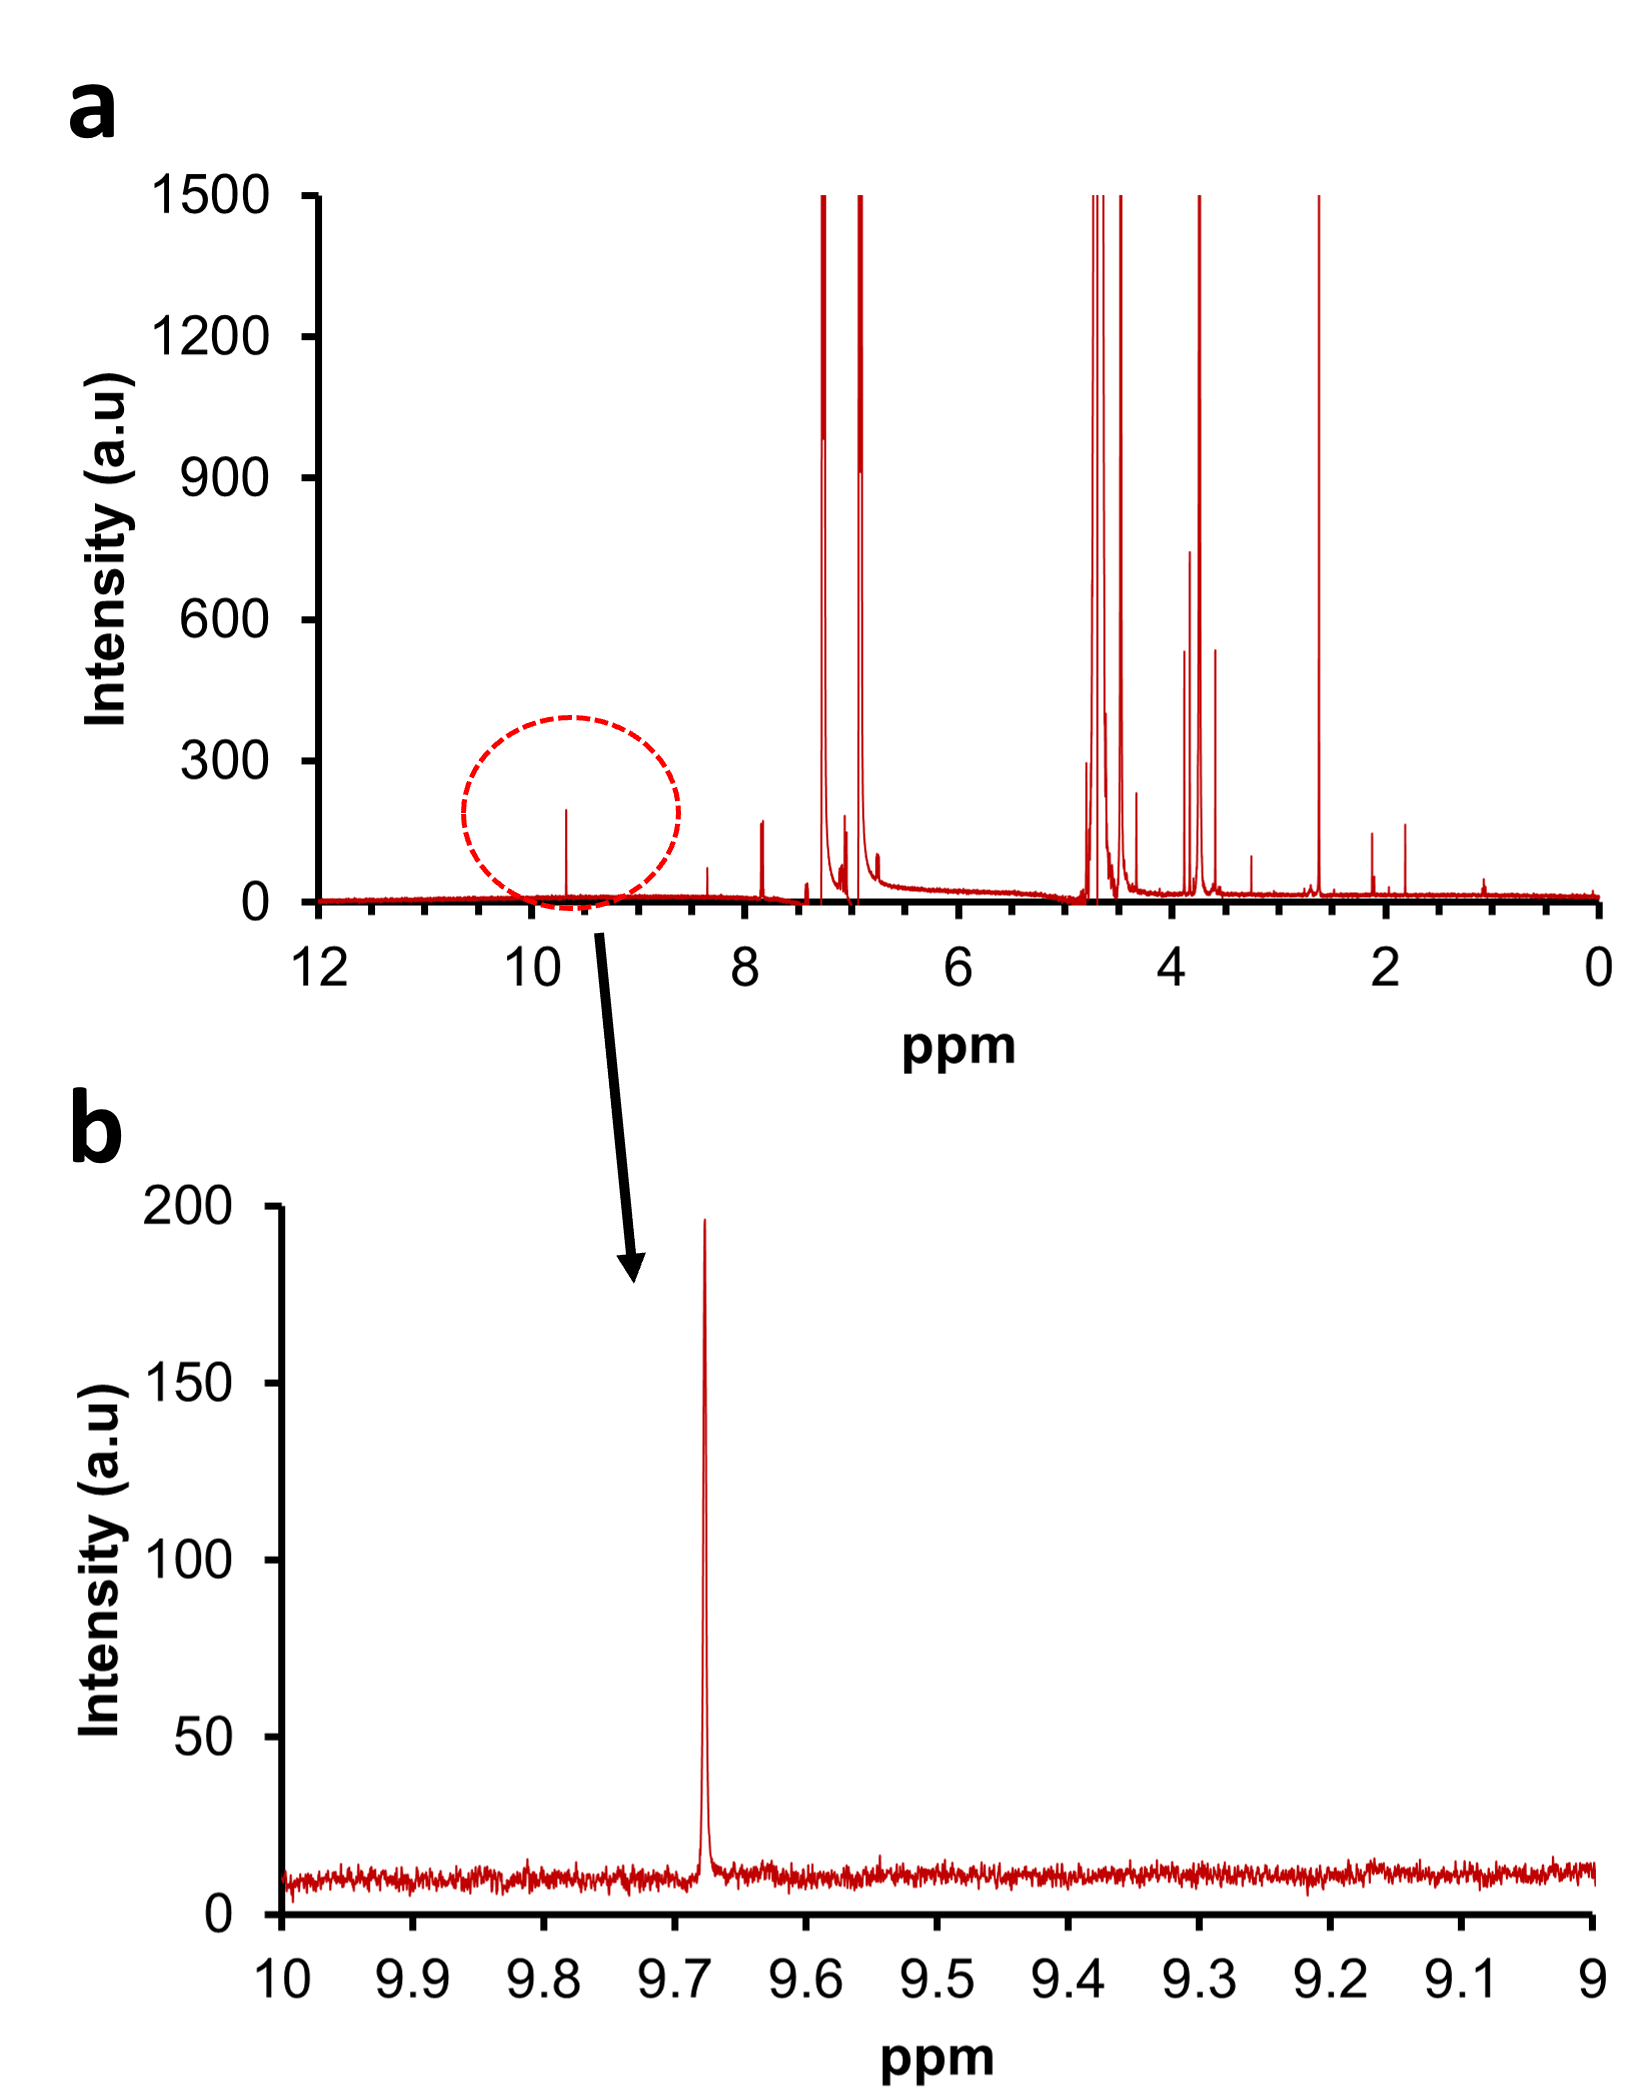


**Fig. S19** 1H NMR spectra of the 4-MeOBA oxidation product analysis, a) full spectrum, and b) aldehyde peak highlighted.


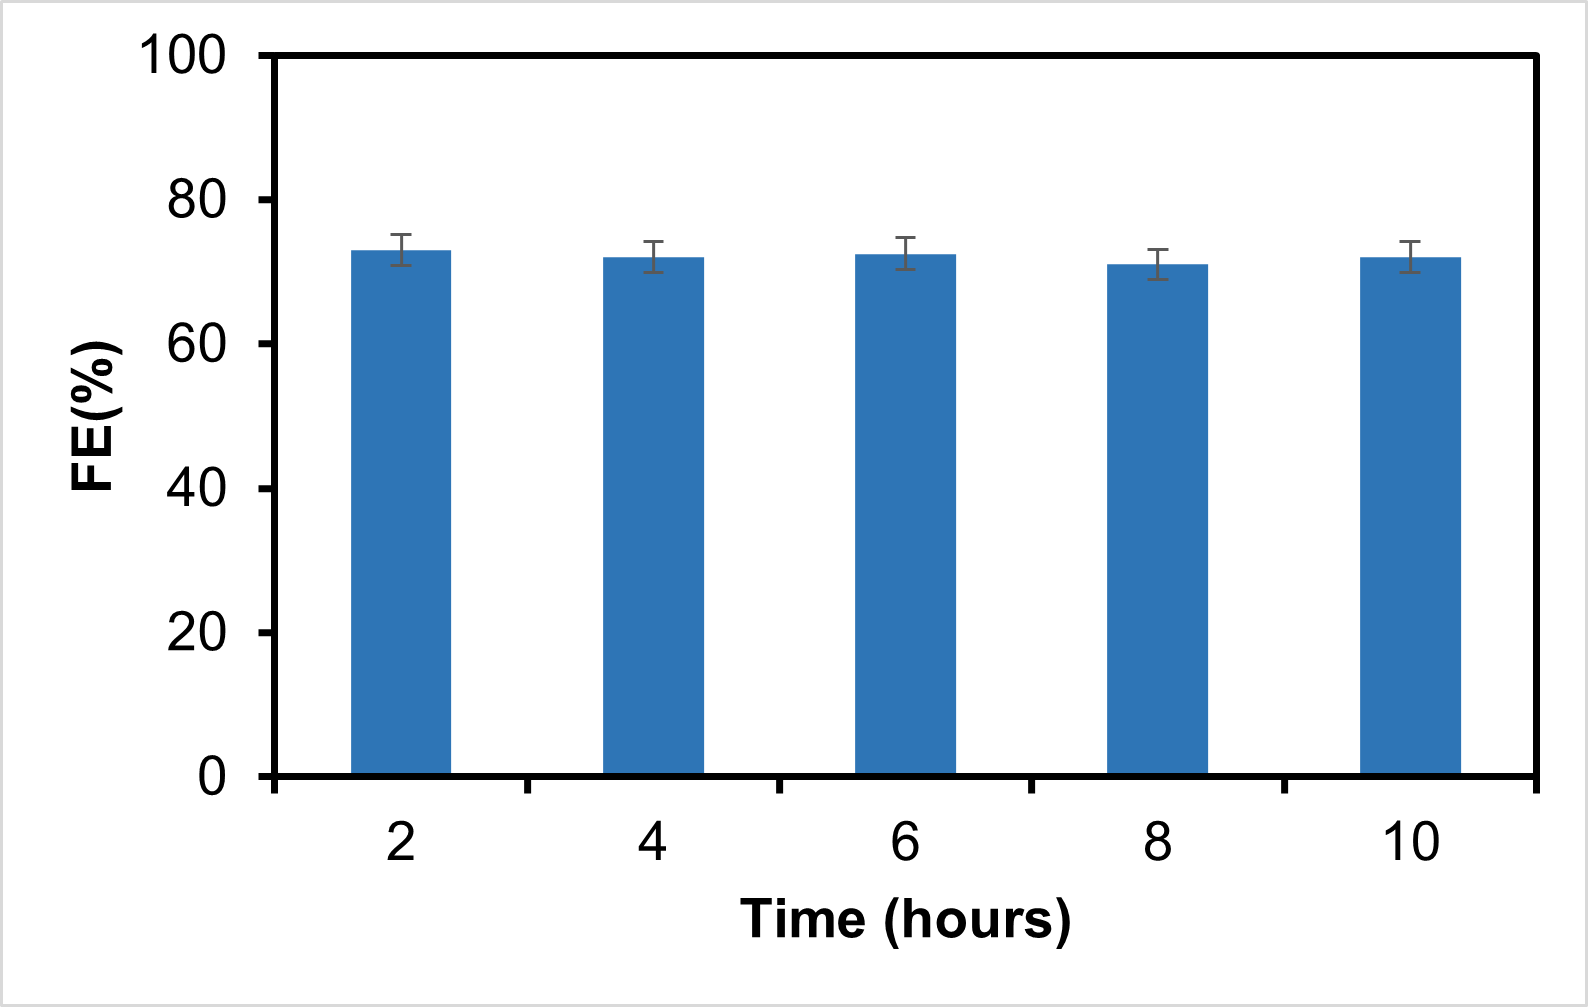


**Fig. S20**. The faradaic efficiency of 4-MeOBD formation during the stability test of Co3O4/WO3/g-C3N4/CP photoanode at +0.6 V vs RHE measured in 0.5 M KHCO3 containing 25 mM 4-MeOBA. The FE remains stable at over 70% throughout the stability test.


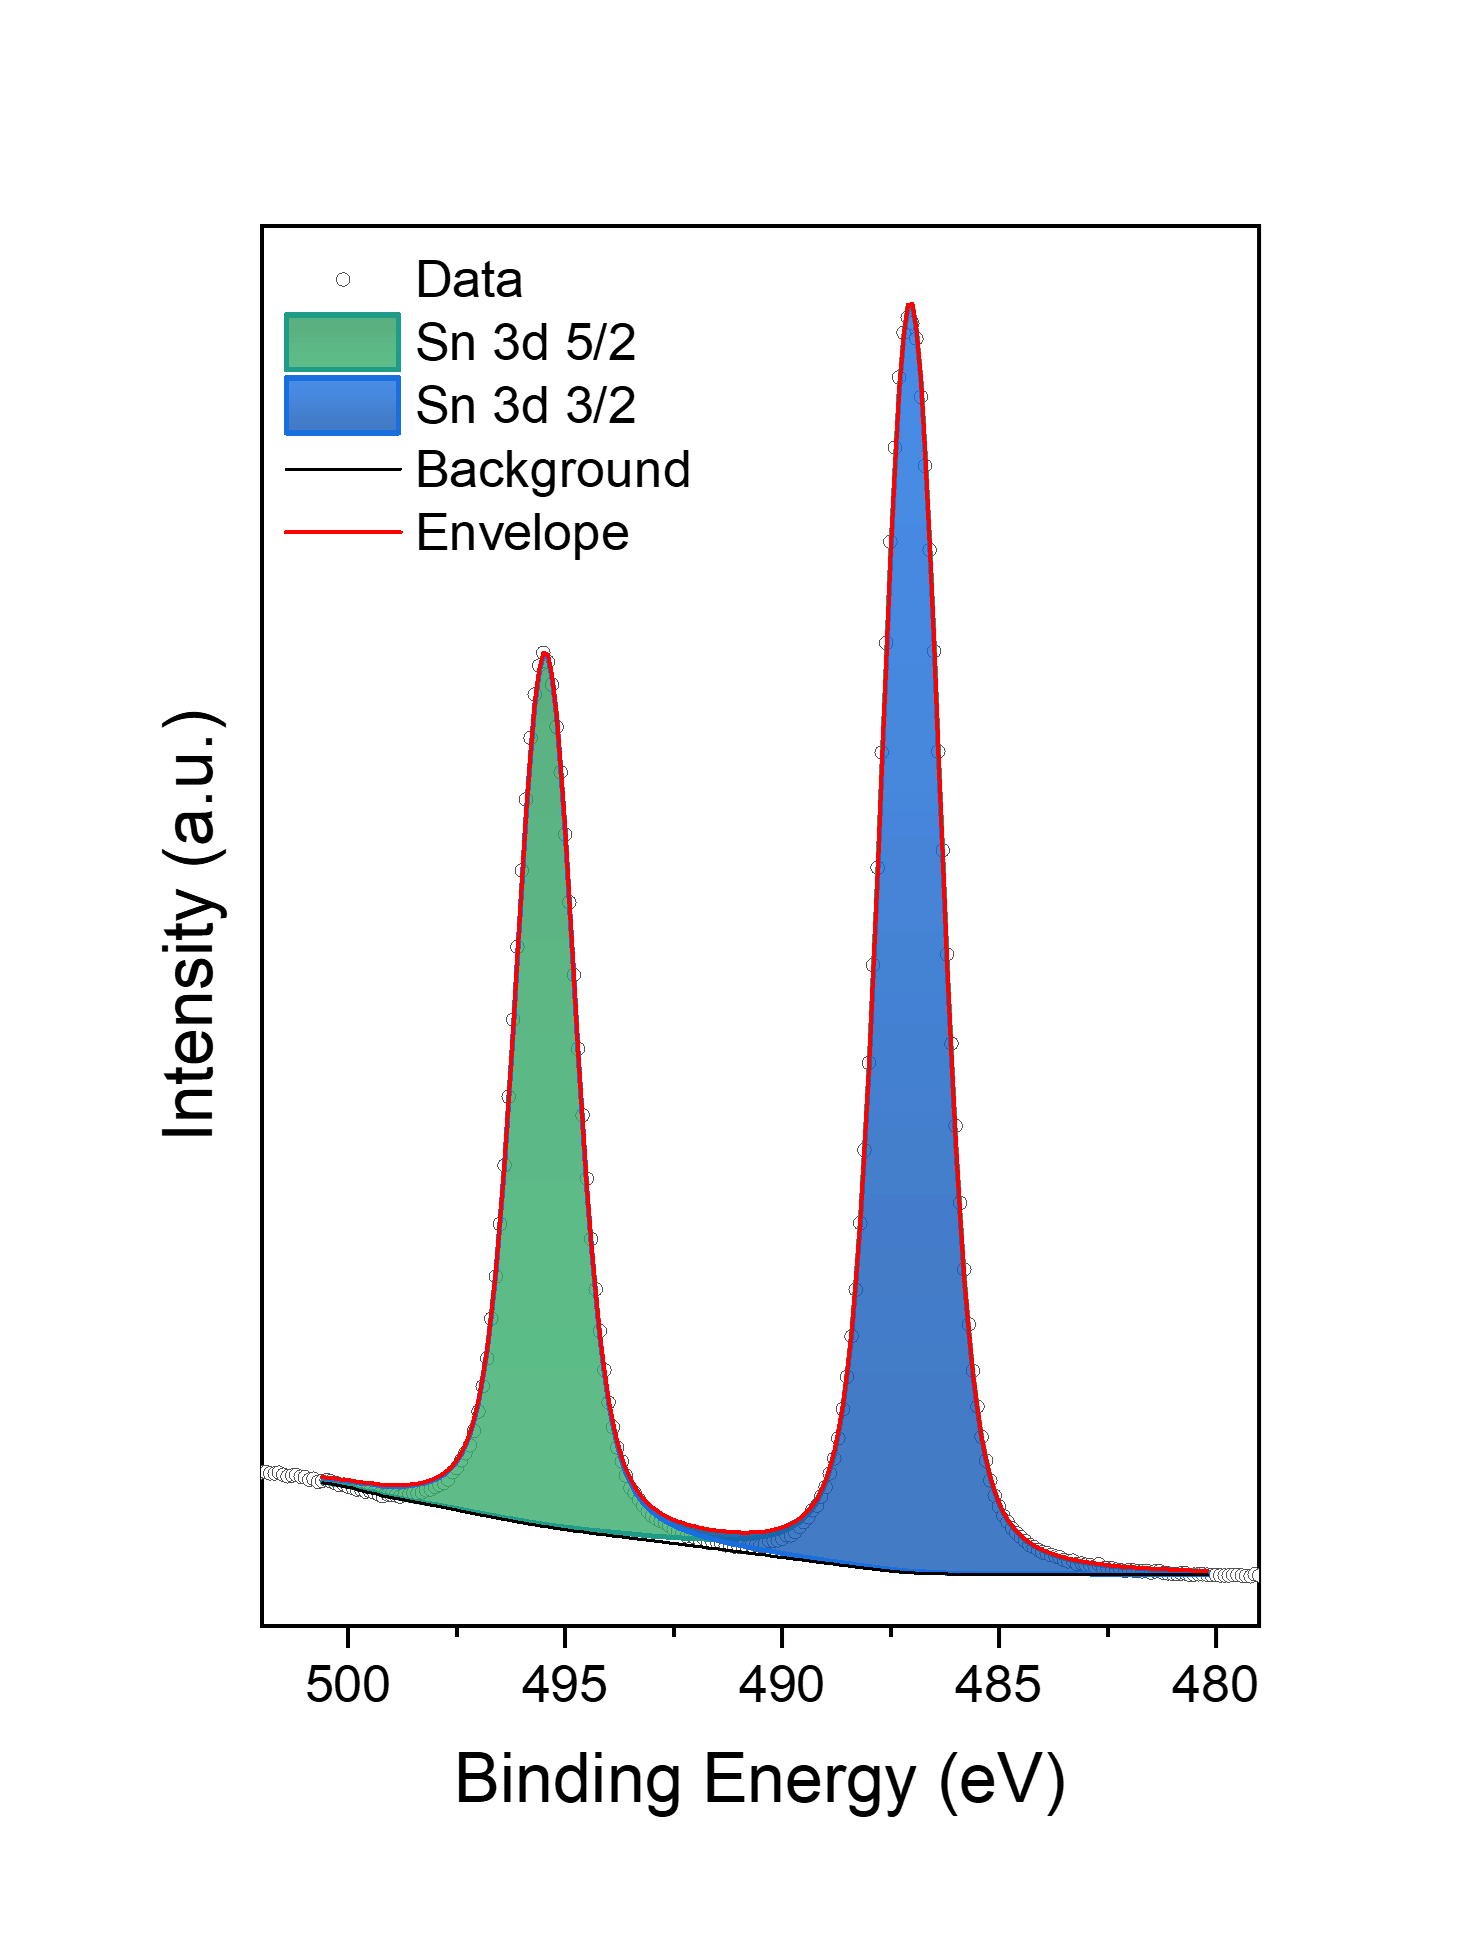


**Fig. S21** XPS spectra of the sputter-deposited Sn on carbon paper

**Table S7:** Comparison of the present external bias-free photoanode-dark cathode system with similar PEC systems reported in the literature

| **Photoanode** | **Cathode** | **CO2 reduction performance** | **Reference** |
| --- | --- | --- | --- |
| CoPi/BiVO4/FTO  **Anode reaction:** Water oxidation | NADH-FDH/EC-PDA/GC  **Cathode reaction:** CO2 reduction into formate (100% FE) | Photocurrent density:  0.1 μA cm−2 | 4 |
| TiO2/FTO  **Anode reaction:** Water oxidation | FDH/MV/CFP  **Cathode reaction:** CO2 reduction into formate (27% FE) | Formate production rate: 31.9 nmol h-1 | 5 |
| STEMPO/DPP-CA/mTiO2/FTO  **Anode reaction:** 4-methylbenzyl alcohol oxidation into 4-methylbenzaldehyde (100% FE) | FHD/mITO/FTO  **Cathode reaction:** CO2 reduction into formate (92% FE) | Photocurrent density: 30 μA cm**−**2  Formate production rate: 2.46 μmol cm-2 | 6 |
|  |  |  |  |
| RuOx/Ni/Ge/GaAs/InGaP  (photovoltaic absorber)  **Anode reaction:** Water oxidation | Sn-Bi2O3  **Cathode reaction:** CO2 reduction into formate (88% FE) | Solar-to-fuel conversion efficiency 12% | 7 |
| NiOOH/α-Fe2O3/FTO  **Anode reaction:** Glucose oxidation | Bi/GaN/Si (**solar cell-photocathode)**  CO2 reduction into formate  (85% FE) | Formate production rate: 23.3 μmol cm−2 | 8 |
| Co3O4/WO3/g-C3N4/CP  **Anode reaction:** 4-methoxybenzyl alcohol oxidation into 4-methoxybenzaldehyde (72% FE) | Sn/CP  **Cathode reaction:** CO2 reduction into formate  (97% FE) | Photocurrent density: 10 μA cm**−**2  Formate production rate: 1.2 ± 0.1 μmol cm-2 | Present work |

**References**

1. Hankin, A., Alexander, J. C. & Kelsall, G. H. Constraints to the flat band potential of hematite photo-electrodes. *Physical Chemistry Chemical Physics* **16**, 16176–16186 (2014).

2. Thangamuthu, M. *et al.* Unlocking photoanode performance through a roadmap for electrophoretic deposition of carbon nitride/tungsten oxide heterojunction thin films. *Mater Adv* (2025) doi:10.1039/D5MA00301F.

3. Biesinger, M. C. *et al.* Resolving surface chemical states in XPS analysis of first row transition metals, oxides and hydroxides: Cr, Mn, Fe, Co and Ni. *Appl Surf Sci* **257**, 2717–2730 (2011).

4. Lee, S. Y., Lim, S. Y., Seo, D., Lee, J.-Y. & Chung, T. D. Light-Driven Highly Selective Conversion of CO2 to Formate by Electrosynthesized Enzyme/Cofactor Thin Film Electrode. *Adv Energy Mater* **6**, 1502207 (2016).

5. Ishibashi, T., Higashi, M., Ikeda, S. & Amao, Y. Photoelectrochemical CO2 Reduction to Formate with the Sacrificial Reagent Free System of Semiconductor Photocatalysts and Formate Dehydrogenase. *ChemCatChem* **11**, 6227–6235 (2019).

6. Antón-García, D. *et al.* Photoelectrochemical hybrid cell for unbiased CO2 reduction coupled to alcohol oxidation. *Nature Synthesis* **1**, 77–86 (2022).

7. Khan, B. *et al.* Unassisted photoelectrochemical CO2-to-liquid fuel splitting over 12% solar conversion efficiency. *Nat Commun* **15**, 6990 (2024).

8. Pan, Y. *et al.* Renewable formate from sunlight, biomass and carbon dioxide in a photoelectrochemical cell. *Nat Commun* **14**, 1013 (2023).
